# Supplementary material for: Decoding Multi-Class Motor Imagery and Motor Execution Tasks Using Riemannian Geometry Algorithms on Large EEG Datasets
Source: MDPI journal article supplement (doi:10.3390/s23115051), 2023-05-25
Supplement: s1 [file s1]

# SUPPLEMENTARY INFORMATION FOR

## Decoding Multi-class Motor Imagery and Motor Execution Tasks Using Riemannian Geometry Algorithms on Large EEG Datasets

**Zaid Shuqfa, Abdelkader Nasreddine Belkacem (Senior Member, IEEE) and  
Abderrahmane Lakas (Senior Member, IEEE)**

College of Information Technology, UAE University, Al Ain 15551, United Arab Emirates

### **Contents:**

#### [Table of Contents](#)

|                                                              |    |
|--------------------------------------------------------------|----|
| Current literature: Comparative Table .....                  | 2  |
| Dataset Description and Experimental Paradigm .....          | 5  |
| Comparison of Different RGDA Adaptation Strategies .....     | 7  |
| Classifiers Performance .....                                | 8  |
| Schematic Diagrams of Classifiers Adaptation Strategies..... | 10 |
| Classification Accuracy Per Class .....                      | 14 |
| Confusion Matrices .....                                     | 21 |
| Simple Main Effect and Pairwise Comparison Data Sheets ..... | 27 |

## Current literature: Comparative Table

*Supplementary Table S1: Riemannian-geometry decoding algorithms (RGDAs) in brain–computer interface (BCI) classification: current literature landscape*  
*The referece number is as per the manuscript. When referring to a section the section is in the manuscript.*

| Paper | Dataset                              | Sub-<br>jects | Cha-<br>nnels       | Sampl-<br>ing<br>[Hz] | Sess-<br>ions | Tasks                                                    | Trials                          | Classes | Epoch-<br>ing        | Pre-<br>proce-<br>ssing             | Feature<br>Extraction | Calibration<br>/Evaluation            | Measure         | Classifier         | Perform-<br>ance                                                                       |  |
|-------|--------------------------------------|---------------|---------------------|-----------------------|---------------|----------------------------------------------------------|---------------------------------|---------|----------------------|-------------------------------------|-----------------------|---------------------------------------|-----------------|--------------------|----------------------------------------------------------------------------------------|--|
| [14]  | BCI<br>comp. IV:<br>dataset<br>IIa   | 9             | 22                  |                       | 2             | MI:<br>L Hand,<br>R Hand,<br>lounge,<br>Foot             | 4s<br>72 trial<br>/task         | 4       | 0.5 s<br>to<br>3.5 s | 8 Hz to<br>30 Hz<br>5th<br>BwBPF    | SBE<br>CM             | Session<br>1<br>to<br>Session<br>2    | Acc.            | MDM                | 0.628                                                                                  |  |
|       |                                      |               |                     |                       |               |                                                          |                                 |         |                      |                                     |                       |                                       | Acc.            | MDMS               | 0.536                                                                                  |  |
|       |                                      |               |                     |                       |               |                                                          |                                 |         |                      |                                     |                       |                                       | Acc.            | MDMU               | 0.648                                                                                  |  |
|       |                                      |               |                     |                       |               |                                                          |                                 |         |                      |                                     |                       |                                       | Acc.            | MDMR               | 0.647                                                                                  |  |
|       |                                      |               |                     |                       |               |                                                          |                                 |         |                      |                                     |                       |                                       | Acc.            | MDMRS              | 0.668                                                                                  |  |
|       |                                      |               |                     |                       |               |                                                          |                                 |         |                      |                                     |                       |                                       | Acc.            | FgMDM              | 0.689                                                                                  |  |
|       |                                      |               |                     |                       |               |                                                          |                                 |         |                      |                                     |                       |                                       | Acc.            | FgMDMS             | 0.667                                                                                  |  |
|       |                                      |               |                     |                       |               |                                                          |                                 |         |                      |                                     |                       |                                       | Acc.            | FgMDMU             | 0.743                                                                                  |  |
|       |                                      |               |                     |                       |               |                                                          |                                 |         |                      |                                     |                       |                                       | Acc.            | FgMDMR             | 0.711                                                                                  |  |
|       | In-house                             | 18            | 30                  |                       | 6             | Mental <sup>a</sup>                                      | 8s<br>15 trial<br>/task<br>/run | 3       |                      | 8 Hz to<br>30 Hz<br>50th<br>FIR BPF |                       | Session<br>1<br>to<br>Sessions<br>2-6 | Acc.            | MDM                | 0.560                                                                                  |  |
|       |                                      |               |                     |                       |               |                                                          |                                 |         |                      |                                     |                       |                                       | Acc.            | MDMS               | 0.385                                                                                  |  |
|       |                                      |               |                     |                       |               |                                                          |                                 |         |                      |                                     |                       |                                       | Acc.            | MDMU               | 0.583                                                                                  |  |
|       |                                      |               |                     |                       |               |                                                          |                                 |         |                      |                                     |                       |                                       | Acc.            | MDMR               | 0.661                                                                                  |  |
|       |                                      |               |                     |                       |               |                                                          |                                 |         |                      |                                     |                       |                                       | Acc.            | MDMRS              | 0.697                                                                                  |  |
|       |                                      |               |                     |                       |               |                                                          |                                 |         |                      |                                     |                       |                                       | Acc.            | FgMDM              | 0.585                                                                                  |  |
|       |                                      |               |                     |                       |               |                                                          |                                 |         |                      |                                     |                       |                                       | Acc.            | FgMDMS             | 0.576                                                                                  |  |
|       |                                      |               |                     |                       |               |                                                          |                                 |         |                      |                                     |                       |                                       | Acc.            | FgMDMU             | 0.727                                                                                  |  |
|       |                                      |               |                     |                       |               |                                                          |                                 |         |                      |                                     |                       |                                       | Acc.            | FgMDMR             | 0.703                                                                                  |  |
| [13]  | BCI<br>comp. IV:<br>dataset<br>IIa   | 9             | 22<br>+<br>3<br>EOG |                       | 2             | MI:<br>L Hand,<br>R Hand,<br>lounge,<br>Foot             | 72 trial<br>/task<br>= 288      | 4       | 0.5 s<br>to<br>2.5 s | 8 Hz to<br>30 Hz<br>5th<br>BwBPF    |                       | 10-fold<br>CV                         | Acc.<br>(OVR)   | SSDT with<br>FGMDM | L = 0.820<br>R = 0.813<br>F = 0.815<br>T = 0.840                                       |  |
|       |                                      |               |                     |                       |               |                                                          |                                 |         |                      |                                     |                       |                                       | Kappa<br>Coeff. |                    | 0.589                                                                                  |  |
|       |                                      |               |                     |                       |               |                                                          |                                 |         |                      |                                     |                       |                                       | Acc.<br>(OVO)   | SSDT with<br>FGMDM | L/R = 0.794<br>L/F = 0.871<br>L/T = 0.865<br>R/F = 0.868<br>R/T = 0.870<br>F/T = 0.820 |  |
|       |                                      |               |                     |                       |               |                                                          |                                 |         |                      |                                     |                       |                                       | Kappa<br>Coeff. |                    | 0.607                                                                                  |  |
|       | BCI<br>comp. III:<br>dataset<br>IIIa | 3             | 64                  | 250                   |               | MI:<br>L Hand,<br>R Hand,<br>lounge,<br>Foot             |                                 | 4       |                      |                                     | SJGDA                 | 5-fold<br>CV                          | Acc.            | SSDT-KNN           | 0.828                                                                                  |  |
|       | In-house                             | 7             | 14                  | 128                   |               | MI:<br>Shoulder<br>(flexion,<br>extension,<br>abduction) | 5s<br>20 trials                 | 3       |                      |                                     | SJGDA                 | 5-fold<br>CV                          | Acc.            | SSDT-KNN           | ≈ 0.850                                                                                |  |
|       | Continued on next page               |               |                     |                       |               |                                                          |                                 |         |                      |                                     |                       |                                       |                 |                    |                                                                                        |  |

<sup>a</sup>Left-hand MI; mental imagery: rotation of a 3D geometric figure, and mental subtraction of a two-digit number from a three-digit number

| Paper                  | Dataset                     | Sub-<br>jects | Cha-<br>nnels | Sampl-<br>ing<br>[Hz] | Sess-<br>ions  | Tasks                            | Trials                | Classes | Epoch-<br>ing  | Pre-<br>proce-<br>ssing            | Feature<br>Selection | Calibration<br>/Evaluation           | Measure           | Classifier | Perform-<br>ance   |
|------------------------|-----------------------------|---------------|---------------|-----------------------|----------------|----------------------------------|-----------------------|---------|----------------|------------------------------------|----------------------|--------------------------------------|-------------------|------------|--------------------|
| [24]                   | BCI comp. III: dataset Iva  | 5             | 118           | 100                   |                | MI: R Hand Foot                  | 140 trial /task = 280 | 2       | 0.5 s to 2.5 s | 7 Hz to 30 Hz 5th BwBPF            | Sample CM            | Uneven number of trials <sup>b</sup> | Acc.              | R-MDRM     | 0.872              |
|                        | BCI comp. III: dataset IIIa | 3             | 60            | 250                   |                | MI: L Hand, R Hand, lounge, Foot |                       | 2       | 0.5 s to 2.5 s | 7 Hz to 30 Hz 5th BwBPF            | Sample CM            |                                      | Kappa Coeff.      | Acc.       | 0.740              |
|                        | BCI comp. IV: dataset IIa   | 9             | 22            | 250                   |                | MI: L Hand, R Hand, lounge, Foot | 72 trial /task 288    | 2       | 0.5 s to 2.5 s |                                    | Sample CM            |                                      | Acc.              |            | 0.810              |
| [29]                   | Clinical dataset            | 1             | 64 ECoG       | 586                   | 4 <sup>c</sup> | MI <sup>d</sup>                  | 200                   | 12      | 0.0 s to 1.0 s | 60 Hz to 130 Hz BPF                | Spatial CM           | 10-fold CV                           | CP                | MDM        | 0.856              |
|                        |                             |               |               |                       |                |                                  |                       |         |                |                                    |                      |                                      |                   | tsSVM      | 0.885              |
| [32]                   | BCI comp. IV: dataset I     | 9             | 22 +          | 250                   | 2              | MI: L Hand, R Hand, lounge, Foot | 72 trial /task 288    | 4       | 2.5 s to 6.0 s | 0.5 Hz to 100 Hz and 50Hz NF       | MRC                  | Session 1 to Session 2               | Acc.              | MLP        | 0.761              |
|                        | dataset IIa                 |               | 3 EOG         |                       |                |                                  |                       |         |                |                                    |                      |                                      |                   |            |                    |
| [5]                    | BCI comp. IV: dataset I     | 7             |               |                       |                | MI: L Hand, R Hand               | 100 trial /task 200   | 2       |                | 8 Hz to 30 Hz 5th BPF and 50 Hz NF | Sample CM            |                                      | Acc.              | MDM        | 0.770 <sup>e</sup> |
|                        | BCI lab. Shandong           | 4             |               |                       |                | MI: L Hand, R Hand, lounge, Foot | 10s 150 tri-als       | 3       |                | 8 Hz to 30 Hz BPF and 50 Hz NF     | Sample CM            |                                      | Acc. <sup>f</sup> |            | 0.800              |
|                        | Jianzhu University          |               |               |                       |                |                                  |                       |         |                |                                    |                      |                                      |                   |            |                    |
| [26]                   | BCI comp. IV: dataset IIa   | 9             | 22            |                       |                | MI: L Hand Foot                  | 144 trial /task       | 4       | 0.5 s to 2.5 s | 8 Hz to 30 Hz 5th BwBPF            | Spatial CM           | 30-fold CV                           | Acc.              | MDM        | 0.632              |
|                        |                             |               |               |                       |                |                                  |                       |         |                |                                    |                      |                                      |                   | TSLDA      | 0.702              |
| Continued on next page |                             |               |               |                       |                |                                  |                       |         |                |                                    |                      |                                      |                   |            |                    |

<sup>b</sup>Uneven number of trials among subjects

<sup>c</sup>2 right arm, 2 left, 2 right finger, and 2 left (20 minute each)

<sup>d</sup>Left and right arm (elbow flexion, wrist extension, and hand grasping), and left and right hand (finger flexion of the thumb, index finger, and middle finger) 'Arm: 2s 50 trials/task = 150 Finger: 1s 80 trials/(thumb and index task) + 40 trials/middle finger task = 200

<sup>e</sup>Four subjects only were included

<sup>f</sup>The average of binary classification accuracy (LH-RH, LH-F, RH-F)

| Paper                      | Dataset                                             | Sub-<br>jects | Chan-<br>nels | Sampling<br>[Hz] | Sess-<br>ions | Tasks                                          | Trials         | Classes | Epoch-<br>ing | Pre-<br>proce-<br>ssing  | Feature<br>Selection | Calibration<br>/Evaluation | Measure | Classifier | Perform-<br>ance |              |  |
|----------------------------|-----------------------------------------------------|---------------|---------------|------------------|---------------|------------------------------------------------|----------------|---------|---------------|--------------------------|----------------------|----------------------------|---------|------------|------------------|--------------|--|
| [23]                       | BCI<br>comp. III:<br>dataset<br>IVa                 | 5             | 9             |                  |               | MI:                                            | 280 trials     | 2       |               | 10 Hz to<br>30 Hz<br>BPF | SPD                  | 10-fold<br>CV              | ER      | RDC        | 0.191            |              |  |
|                            |                                                     |               |               |                  |               | R Hand<br>R Foot                               |                |         |               |                          |                      |                            |         | FRDC       | 0.148            |              |  |
| This<br>paper <sup>§</sup> | physionet<br>EEG Mo-<br>tor<br>Movement<br>/Imagery | 103           | 64            | 160              | 1             | ME:                                            | 4s             | 8       | 0.0 s<br>to   | 8 Hz to<br>30 Hz         | Sample<br>CM         | 10-fold<br>CV              | Acc.    | MDM        | 0.815            |              |  |
|                            |                                                     |               | 29            |                  |               | L Hand,                                        | 21 to 24       |         |               |                          |                      |                            |         |            |                  |              |  |
|                            |                                                     |               |               |                  |               | R Hand,<br>Both Hands,<br>Both Feet            | trial<br>/task |         |               |                          |                      |                            |         |            | 4.0 s            | 5th<br>BwBPF |  |
|                            |                                                     |               | 64            |                  |               | MI:                                            |                |         |               |                          |                      |                            |         |            |                  |              |  |
|                            |                                                     |               | 29            |                  |               | L Hand,<br>R Hand,<br>Both Hands,<br>Both Feet |                |         |               |                          |                      |                            | Acc.    | MDM        | 0.721            |              |  |

Table Acronyms and Abbreviations:

|        |                                                             |
|--------|-------------------------------------------------------------|
| Acc:   | Mean Accuracy (%)                                           |
| BPF:   | Bandpass Filter                                             |
| BwBPF: | Butterworth Bandpass Filter                                 |
| Coeff: | Coefficient                                                 |
| CP:    | Classification Performance                                  |
| FGMDM: | Filter Geodesic Minimum Distance to Riemannian Mean         |
| FIR:   | Finite Impulse Response                                     |
| FRDC:  | Simple Riemannian Distance Classification, Filtered Version |
| MLP:   | Multi-layer Perceptron                                      |
| MRC:   | Multiple Riemannian Covariance                              |
| NF:    | Notch Filtering                                             |
| OVO:   | One-vs-One                                                  |
| OVR:   | One-vs-Rest                                                 |
| RDC:   | Simple Riemannian Distance Classification                   |
| SBE:   | Shrinkage-based Estimator                                   |
| SPD:   | Symmetric Positive Definite                                 |
| SSDT:  | Subject-specific Decision Tree                              |
| TSLDA: | Tangent Space Linear Discriminant Analysis                  |
| tsSVM: | Tangent-space Support Vector Machine                        |

<sup>§</sup>For the rest of results, refer to the paper

## Dataset Description and Experimental Paradigm

The dataset EEG Motor Movement/Imagery Dataset v1.0.0 consists of 1500 EEG recordings taken from 109 volunteered subjects. Each subject has 26-minute EEG recordings in European Data Format 'plus' files (EDF+). The run files are structured in folders, each of which is named using the subject identifier; e.g., S015 for subject number 15. The name of the run file concatenates the subject identifier and the run number, e.g., S099R11.edf is the name of the file containing run 11 of subject 99.

The data were obtained using a general-purpose BCI system (BCI2000). The signals were sampled at 160 Hz from 64 electrodes as per the international 10-10 system excluding electrodes Nz, F9, F10, FT9, FT10, A1, A2, TP9, TP10, P9, and P10. Each volunteer was subjected to 14 EEG-recording runs as described in the table below, where the first two were baseline runs and are not used for classification in the present study.

*Supplementary Table S2: Tasks, runs, and annotations.*

| Task              | Description                                    | UL<br>or BL | ME<br>or MI | Runs      | Annotations |               |               | Duration<br>for each run | Used in the<br>classification |
|-------------------|------------------------------------------------|-------------|-------------|-----------|-------------|---------------|---------------|--------------------------|-------------------------------|
|                   |                                                |             |             |           | T0          | T1            | T2            |                          |                               |
| <b>Baseline 1</b> | Keep eyes open                                 | -           | -           | 1         | -           | -             | -             | 1 minute                 | No                            |
| <b>Baseline 2</b> | Keep eyes closed                               | -           | -           | 2         | -           | -             | -             | 1 minute                 | No                            |
| <b>Task 1</b>     | Open and close<br>right/left fist              | UL          | ME          | 3, 7, 11  | Relax       | Left<br>fist  | Right<br>fist | 2 minutes                | Yes                           |
| <b>Task 2</b>     | Imagine opening and<br>closing right/left fist | UL          | MI          | 4, 8, 12  | Relax       | Left<br>fist  | Right<br>fist | 2 minutes                | Yes                           |
| <b>Task 3</b>     | Open and close<br>both fists/feet              | BL          | ME          | 5, 9, 13  | Relax       | Both<br>fists | Both<br>feet  | 2 minutes                | Yes                           |
| <b>Task 4</b>     | Imagine opening and<br>closing both fists/feet | BL          | MI          | 6, 10, 14 | Relax       | Both<br>fists | Both<br>feet  | 2 minutes                | Yes                           |

UL: Unilateral

BL: Bilateral

ME: Motor Execution

MI: Motor Imagery

During each run, when the subject saw a target on the screen, they corresponded to its position depending on the task under the experiment. Supplementary Figure S1 shows the experimental procedure. In an ME run (Task 1) for example, if the target appeared on either side of the screen (horizontally), then the subject opened and closed the corresponding fist until the target disappeared; otherwise, for MI runs (Task 2), they imagined opening and closing the corresponding fist until the target disappeared. The same applied to Tasks 3 and 4, except that they were Bilateral (BL) tasks, i.e., the subject opened and closed (or imagined opening and closing) both fists or feet when the target appeared on the top or bottom of the screen, respectively (see the figure below).

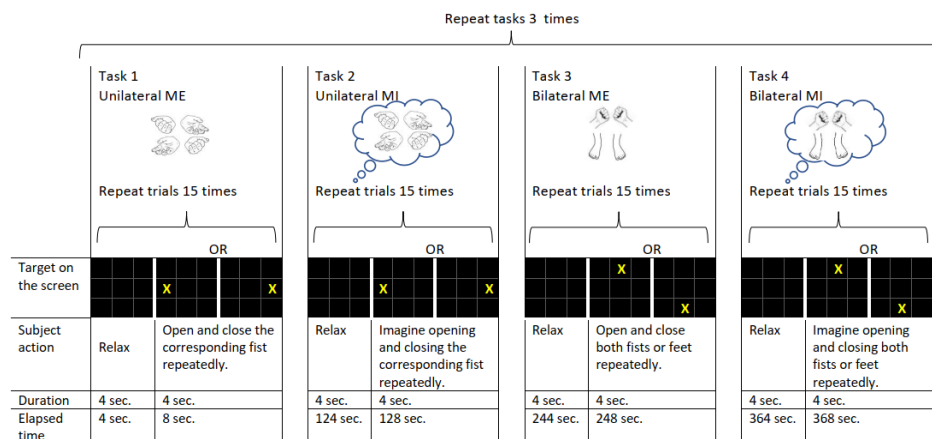

*Supplementary Figure S1: Experimental paradigm: Each experiment run consists of a 4-second relax trial followed by a 4-second motor imagery (or motor execution) trial. Each run is composed of 15 pairs of relax/action trials making a 2-minute recording.*

*The subject starts the corresponding action based on a cue.*

Each trial was 4-second long and was preceded by a 4-second relax trial. The single run comprised 15 pairs of relax and execution/imagery trials, creating a two-minute run containing 30 trials; each run was saved as an EDF+ file. Three trials annotated as T0, T1, and T2 are in each run, where the annotation differs according to the task under consideration (see Supplementary Table S2).

## Comparison of Different RGDA Adaptation Strategies

*Supplementary Table S3: Pros and Cons of different adaptation strategies*

| Method              | Pros                                                                                                                                                                                                                                                                                                                                                 | Cons                                                                                                                                                                                                                                                              |
|---------------------|------------------------------------------------------------------------------------------------------------------------------------------------------------------------------------------------------------------------------------------------------------------------------------------------------------------------------------------------------|-------------------------------------------------------------------------------------------------------------------------------------------------------------------------------------------------------------------------------------------------------------------|
| <b>Baseline</b>     | <p>Straight forward and simple concept</p> <p>Relatively less computational complexity when compared with the adaptation strategies.</p> <p>Provides better performance when data samples are limited [45].</p>                                                                                                                                      | <p>Static, does not adapt with new trials, hence does not accommodate with intersession and inter subject variability [40]</p>                                                                                                                                    |
| <b>Supervised</b>   | <p>The parameters of the classifier update gradually while testing to deal with variability [40]</p> <p>It can be calibrated initially with fewer data samples and the fine-tuning goes as the classifier is used online (or while testing)</p> <p>It's the best adaptation strategy in terms of performance</p>                                     | <p>Data labels are required during testing [14] which is not realistic assumption in real applications unless there is a user feedback mechanism [40]</p> <p>It requires more data samples to train properly [45]</p>                                             |
| <b>Unsupervised</b> | <p>The parameters of the classifier update gradually while testing to deal with variability [40]</p> <p>It can be calibrated initially with fewer data samples and the fine-tuning goes as the classifier is used online (or while testing)</p> <p>The class prototype updates based on the predicted label which is a realistic assumption [45]</p> | <p>It adapts depending on the predicted label [45], which may be an inaccurate prediction.</p> <p>In comparison to the static classifier, it requires more data samples to train properly [45]</p> <p>Its more difficult compared to the supervised ones [46]</p> |
| <b>Rebiase</b>      | <p>Does not modify the classifier or its parameters, instead it shift the output to minimize the error. [14]</p>                                                                                                                                                                                                                                     | <p>In comparison to the static classifier, it requires more data samples to train properly [45]</p> <p>The subject BCI-literacy affects its performance, a lot [45].</p>                                                                                          |

## Classifiers Performance

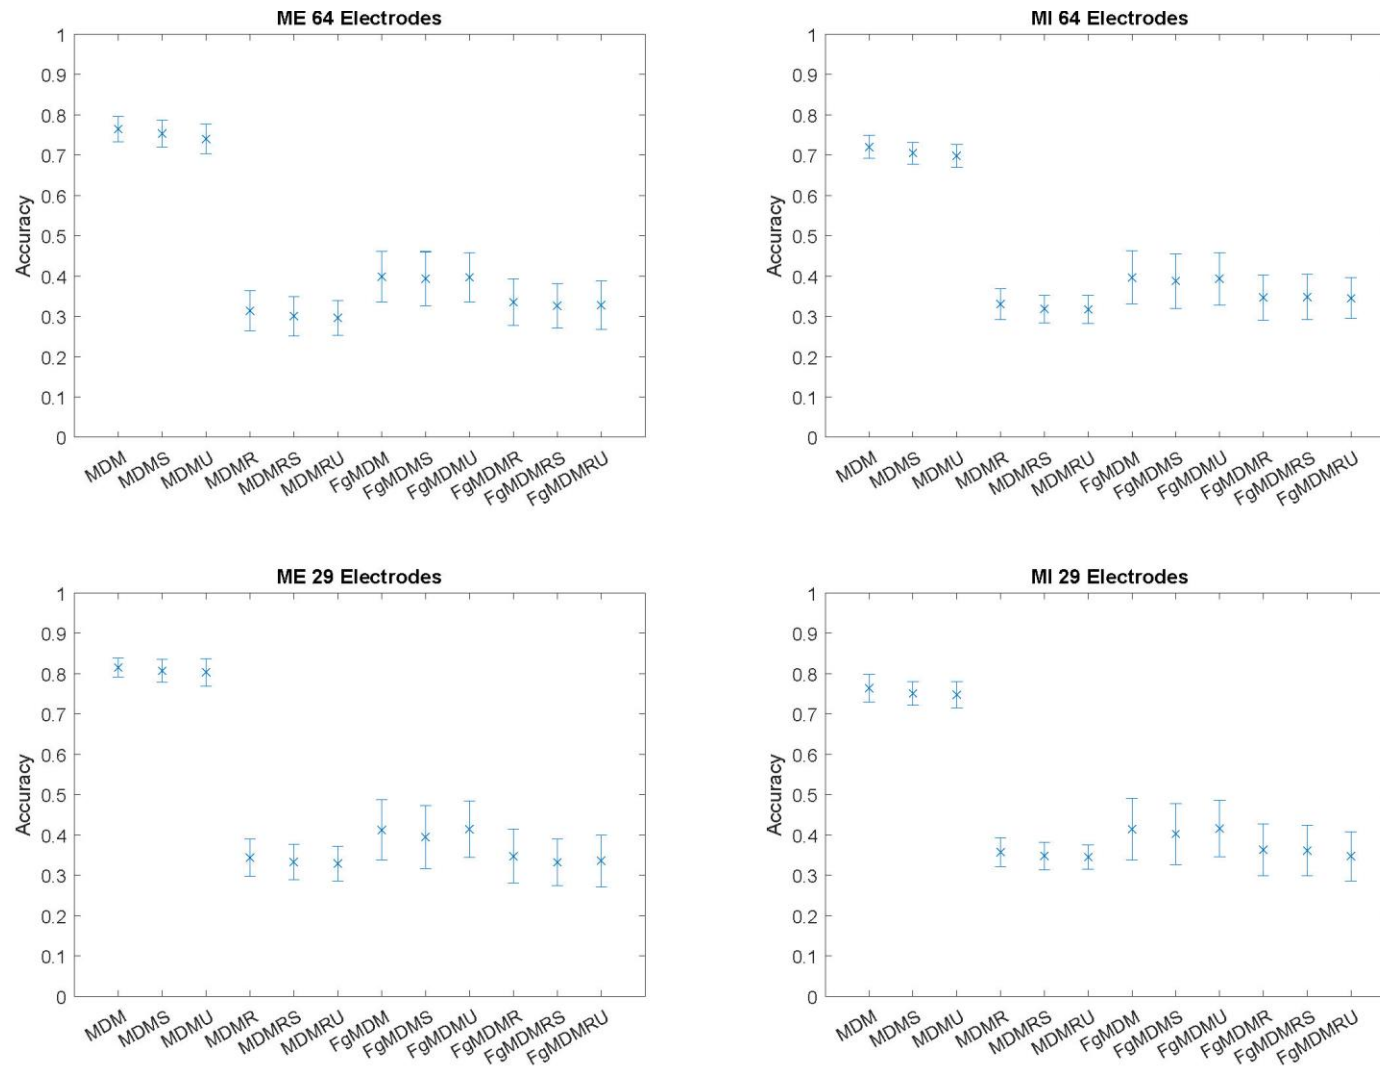

Supplementary Figure S2: Classifiers' performance: The accuracy of all classifiers under different scenarios. The errors bars represent one standard deviation

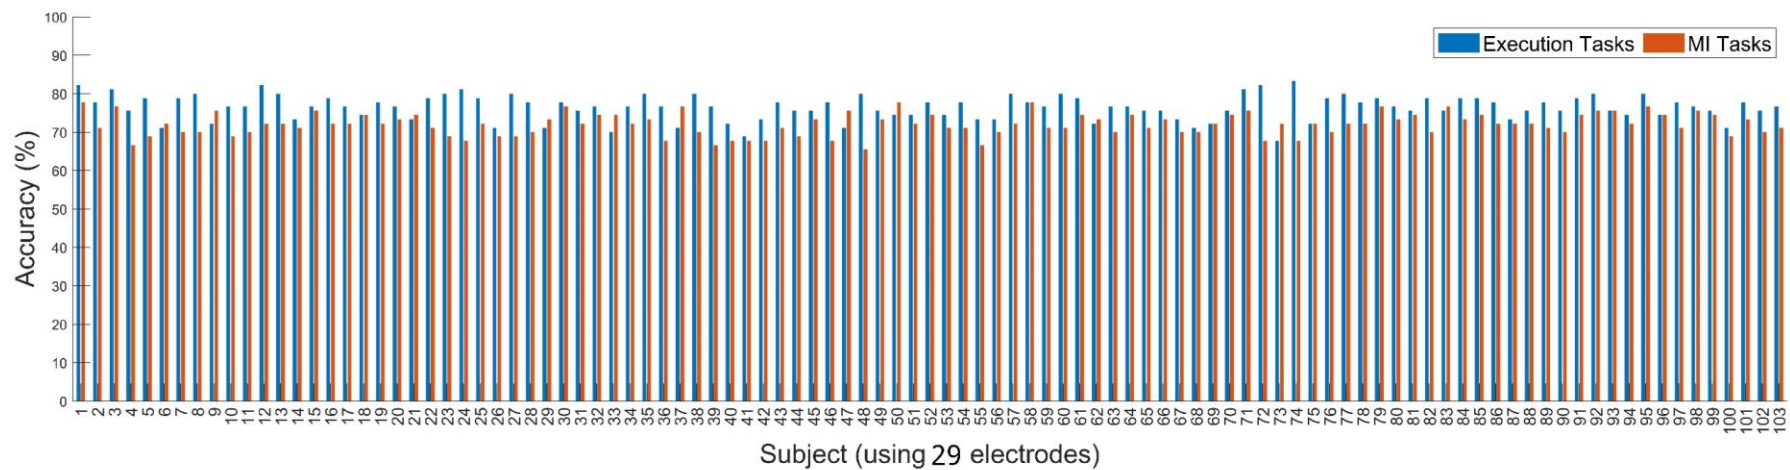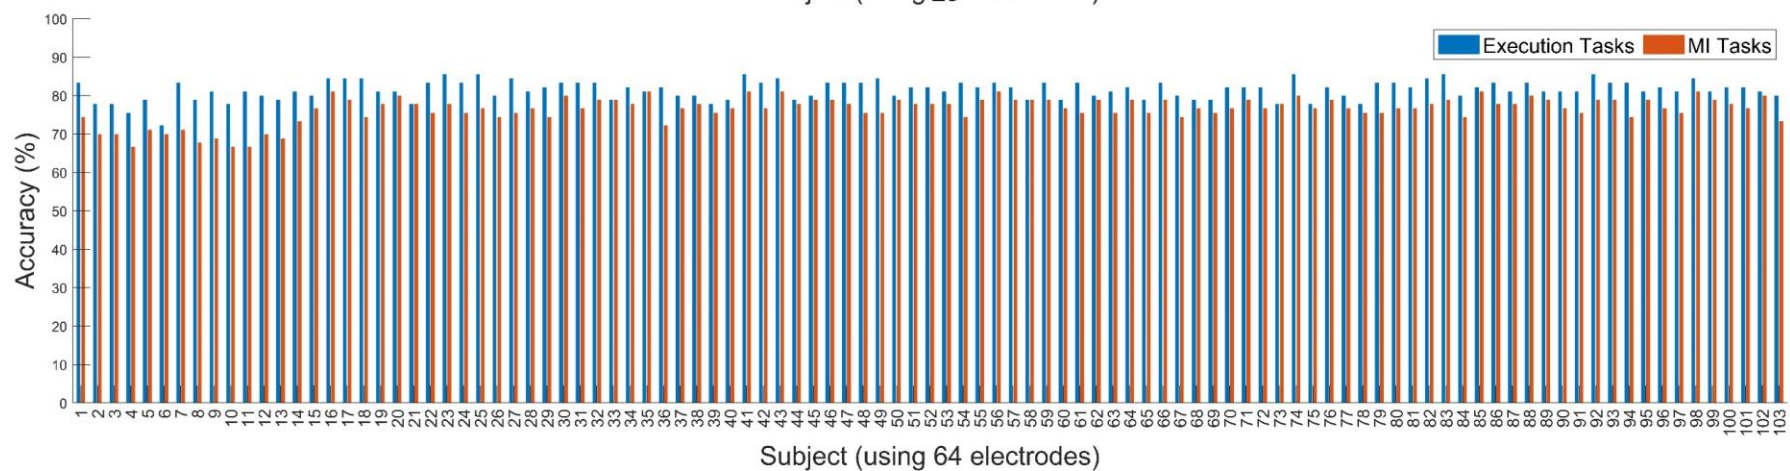

Supplementary Figure S3: Subject-wise MDM classifier performance: MDM classifier performance when classifying ME vs MI tasks for all subjects using 29 electrodes and 64 electrodes.

## Schematic Diagrams of Classifiers Adaptation Strategies

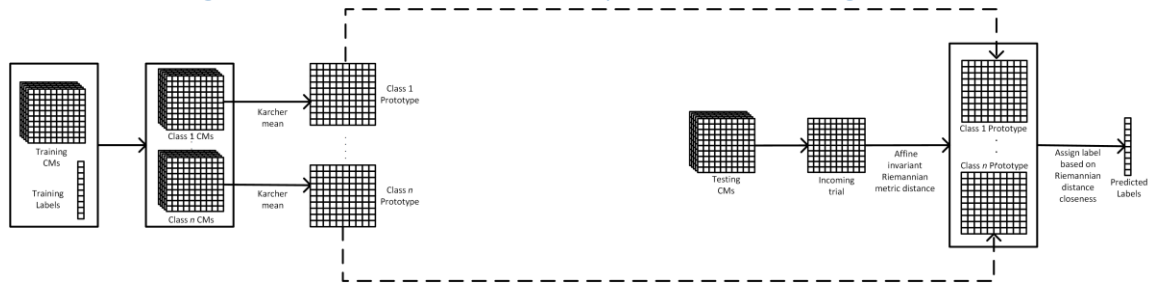

(a) Calibration/Testing

(b) Evaluation/Testing

Supplementary Figure S4: MDM Schematic Diagram

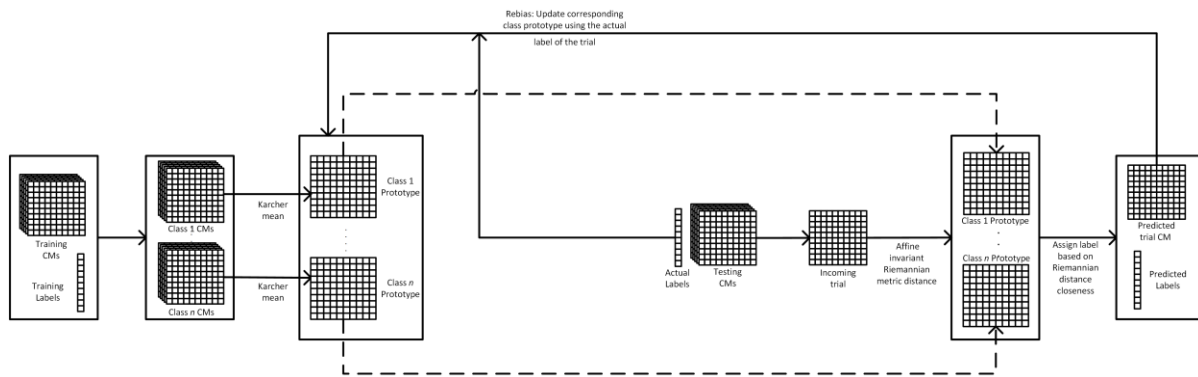

(a) Calibration/Testing

(b) Evaluation/Testing

Supplementary Figure S5: MDMS Schematic Diagram

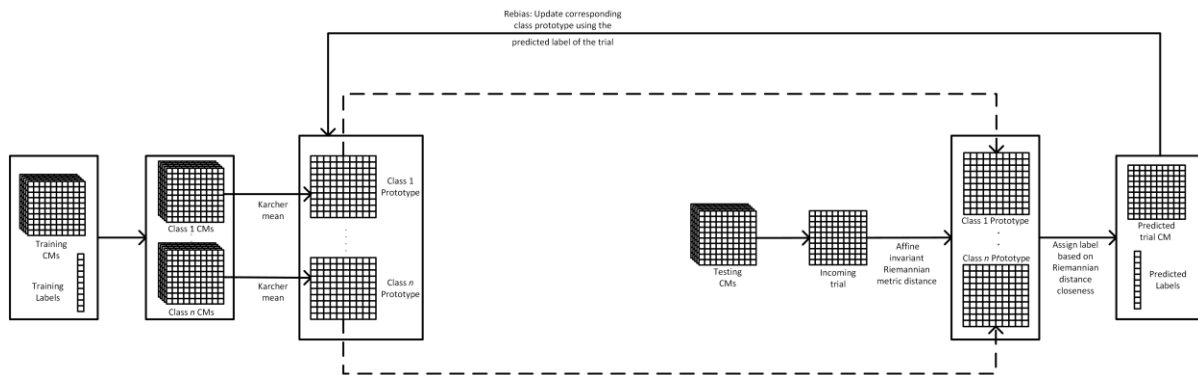

(a) Calibration/Testing

(b) Evaluation/Testing

Supplementary Figure S6: MDMU Schematic Diagram

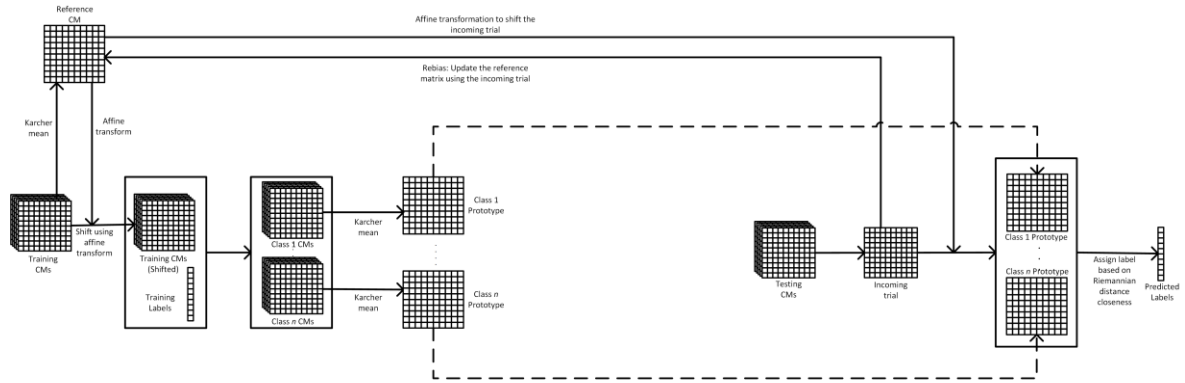

(a) Calibration/Testing

(b) Evaluation/Testing

Supplementary Figure S7: : MDMR Schematic Diagram

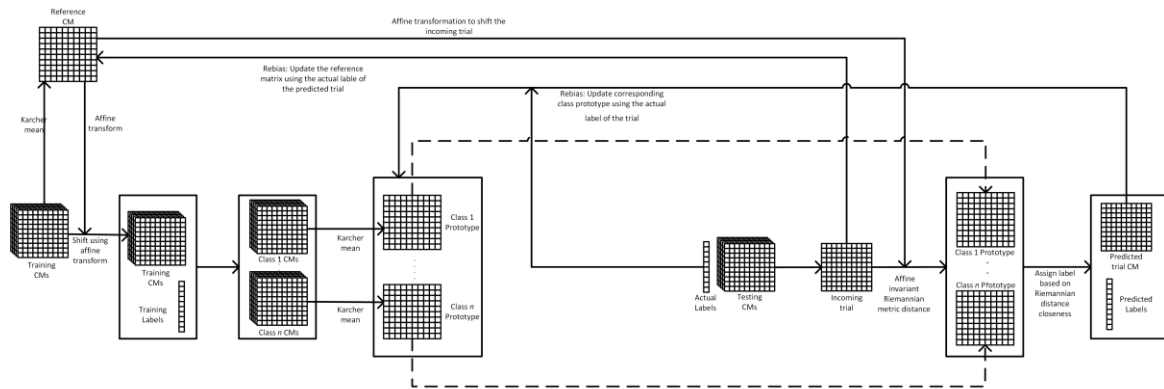

(a) Calibration/Testing

(b) Evaluation/Testing

Supplementary Figure S8: MDMRS Schematic Diagram

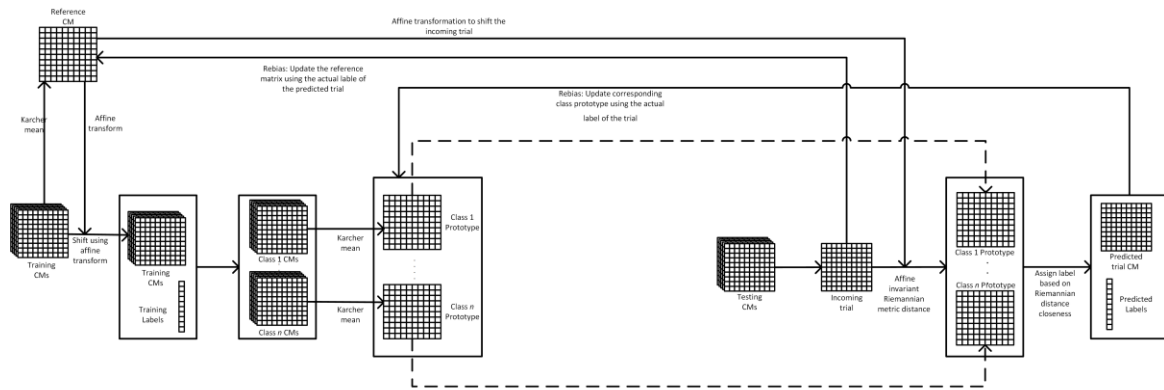

(a) Calibration/Testing

(b) Evaluation/Testing

Supplementary Figure S9: MDMRU Schematic Diagram

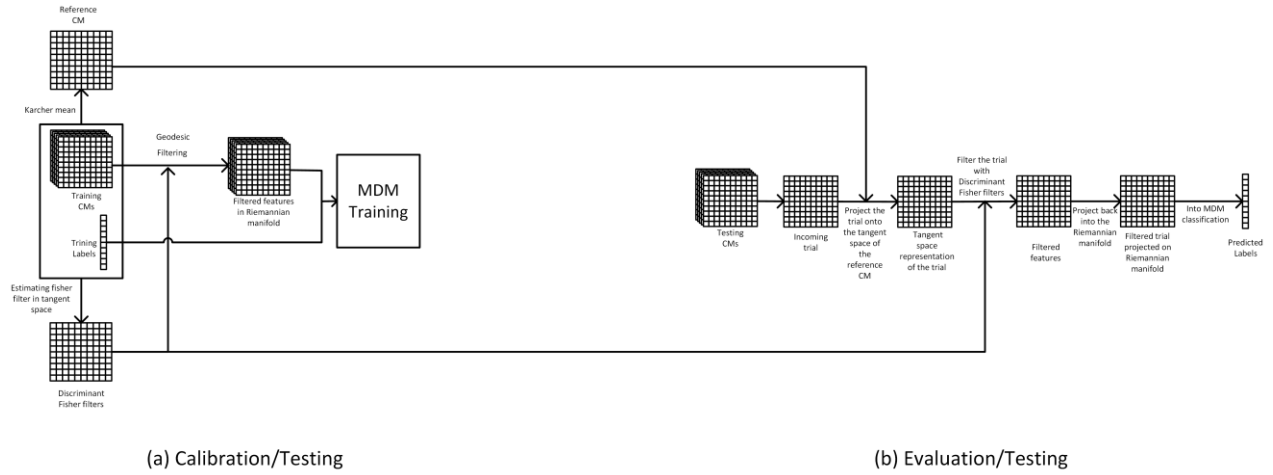

Supplementary Figure S10: FgMDM Schematic Diagram

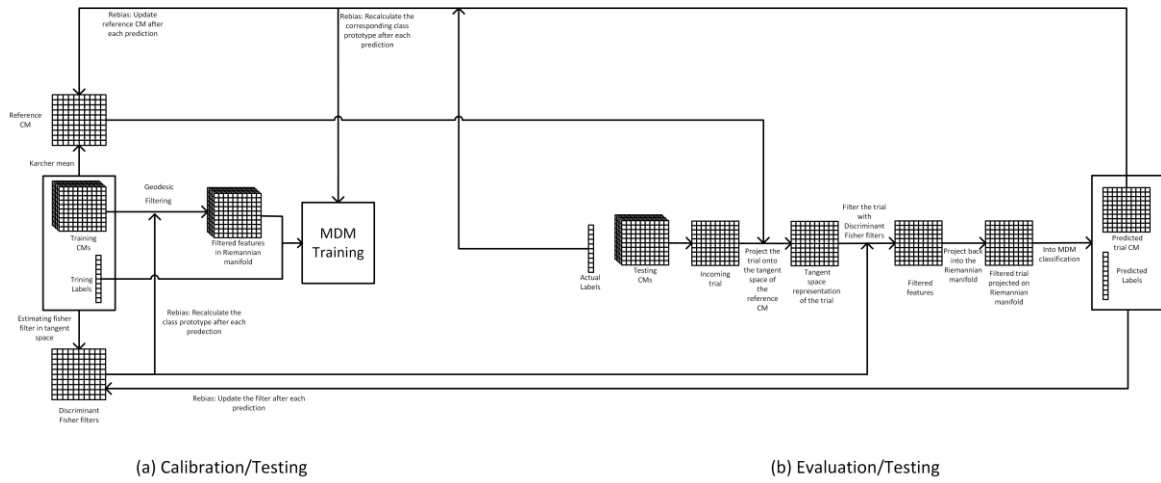

Supplementary Figure S11: FgMDMS Schematic Diagram

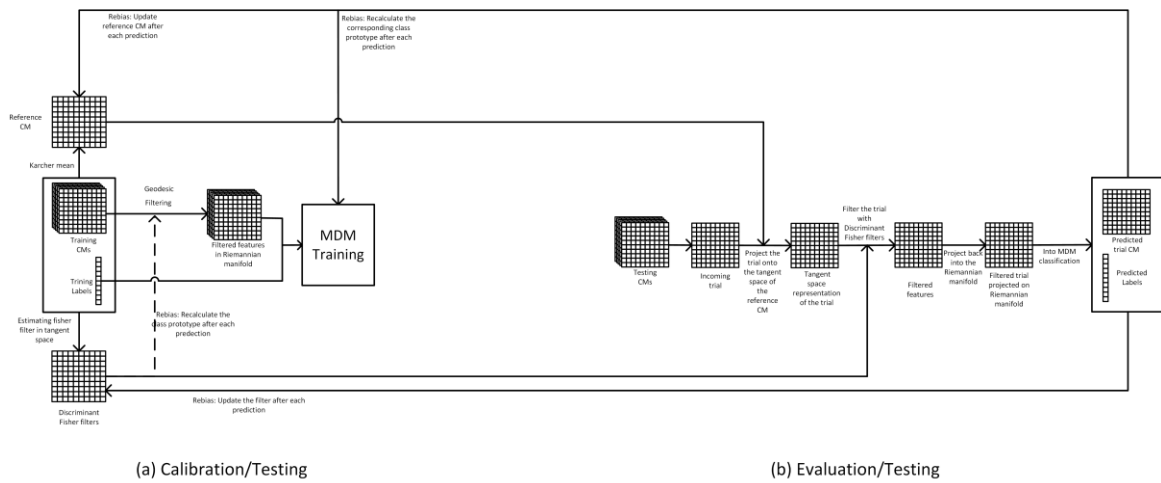

Supplementary Figure S12: FgMDMU Schematic Diagram

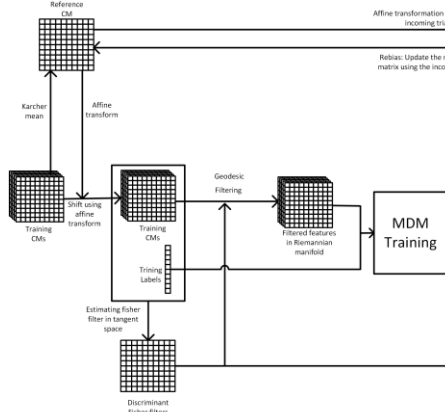

(a) Calibration/Testing

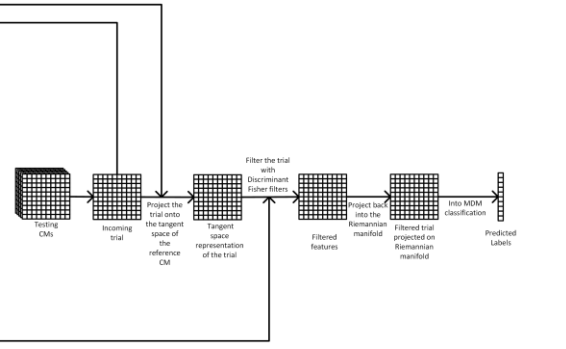

(b) Evaluation/Testing

Supplementary Figure S13: FgMDMR Schematic Diagram

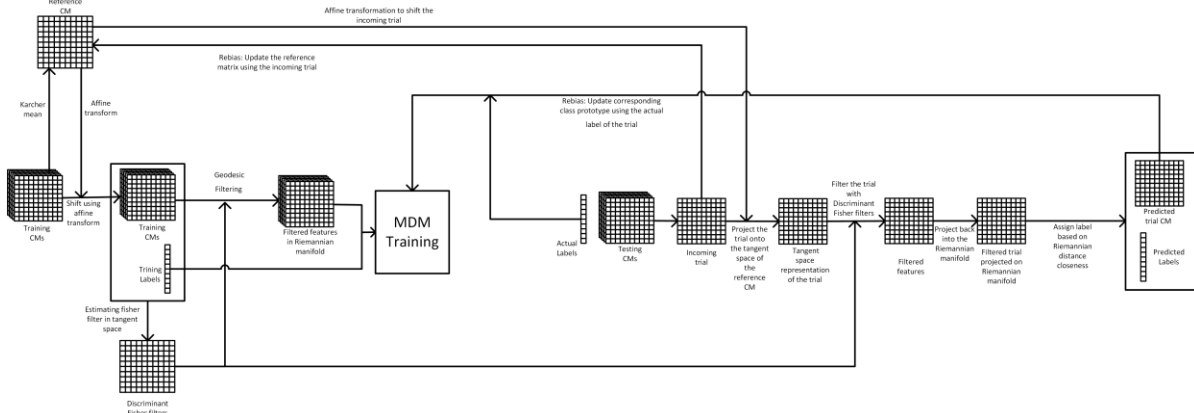

(a) Calibration/Testing

(b) Evaluation/Testing

Supplementary Figure S14: FgMDMRS

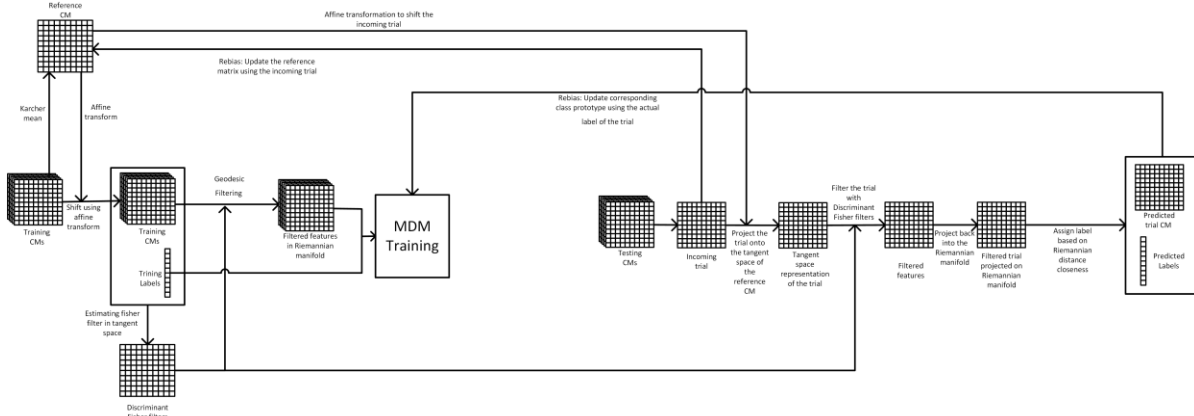

(a) Calibration/Testing

(b) Evaluation/Testing

Supplementary Figure S15: FgMDMRU Schematic Diagram

## Classification Accuracy Per Class

The accuracy per class for each classifier are presented in the figures 1-12 below. Consider the number of subjects is  $n = 103$  and the summation index is  $s$  for subject and the folds are  $k = 10$  and the summation index is  $f$ , then the accuracy per class ( $CA$ ) is calculated according to the following formula. Note that the average class accuracy ( $ACA$ ) represents the mean accuracy of the four classes, and it is slightly different than the overall classifier performance where  $m = 4$  is the number of classes. For the classifier performance, please refer to the paper.

$$CA = \frac{\sum_{s=1}^n \frac{\sum_{f=1}^k \frac{TP_f + TN_f}{TP_f + TN_f + FP_f + FN_f}}{k}}{n}$$

$$ACA = \frac{CA_{class1} + CA_{class2} + CA_{class3} + CA_{class4}}{m}$$

The error bars represent the  $\pm$  one standard deviation ( $CSD$ ) of all classifier's accuracy for one class at a time. The error bar of the average column represents the average of the standard deviations of the four classes ( $ASD$ ) as follows:

$$CSD = \sqrt{\frac{\sum_s^n (CA_s - \mu)^2}{n}}$$

$$ASD = \frac{CSD_{class1} + CSD_{class2} + CSD_{class3} + CSD_{class4}}{m}$$

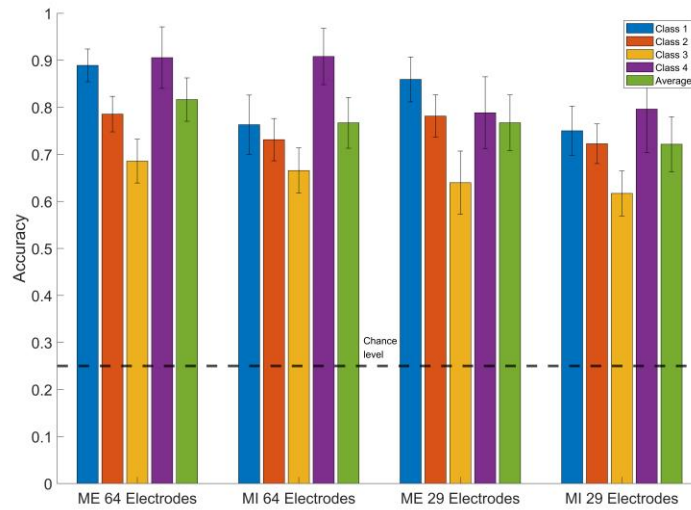

Supplementary Figure S16: The classification accuracy per class for MDM classifier under the different scenarios.

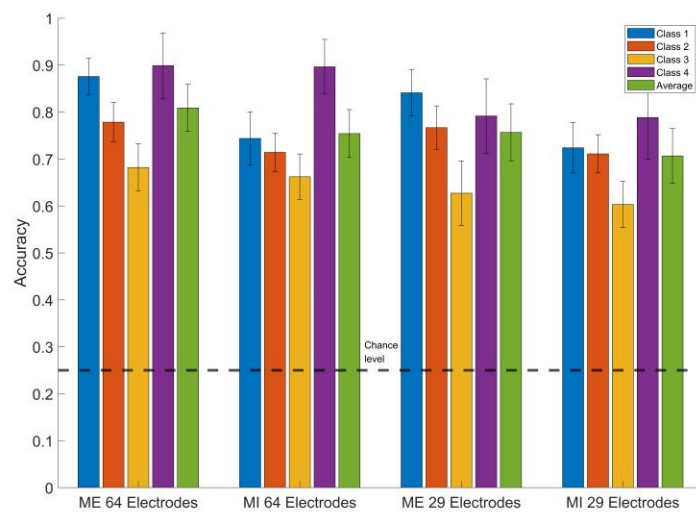

Supplementary Figure S17: The classification accuracy per class for MDMS classifier under the different scenarios.

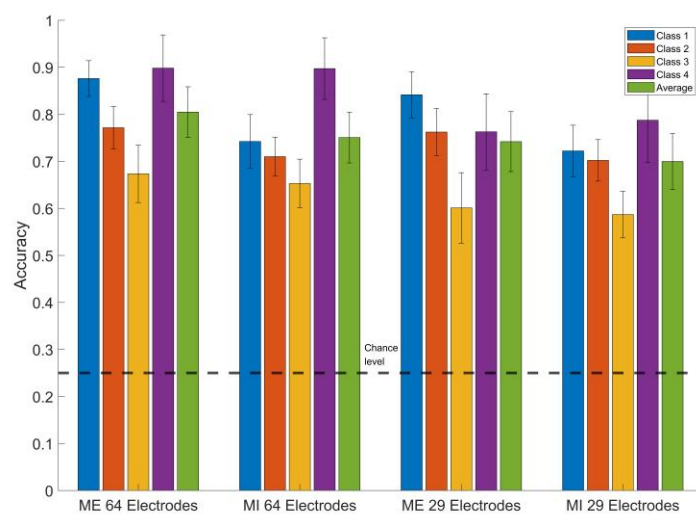

Supplementary Figure S18: The classification accuracy per class for MDMU classifier under the different scenarios.

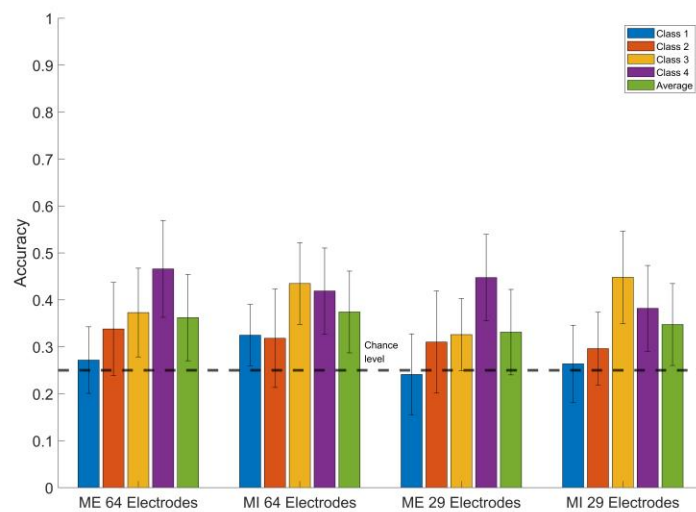

Supplementary Figure S19: The classification accuracy per class for MDMR classifier under the different scenarios.

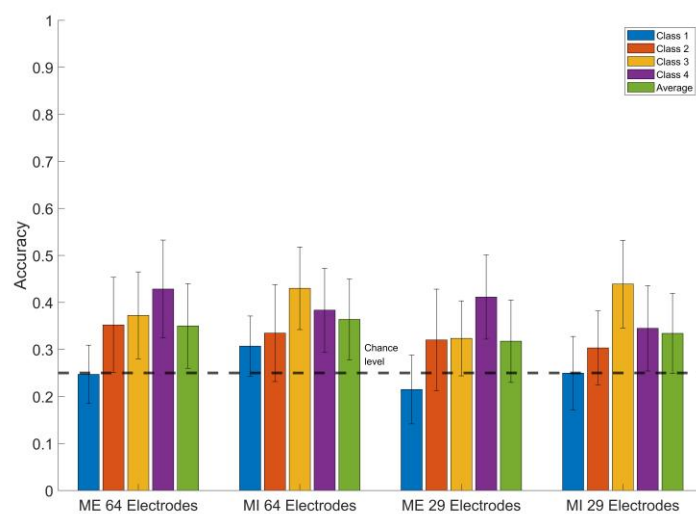

Supplementary Figure S20: The classification accuracy per class for MDMRS classifier under the different scenarios.

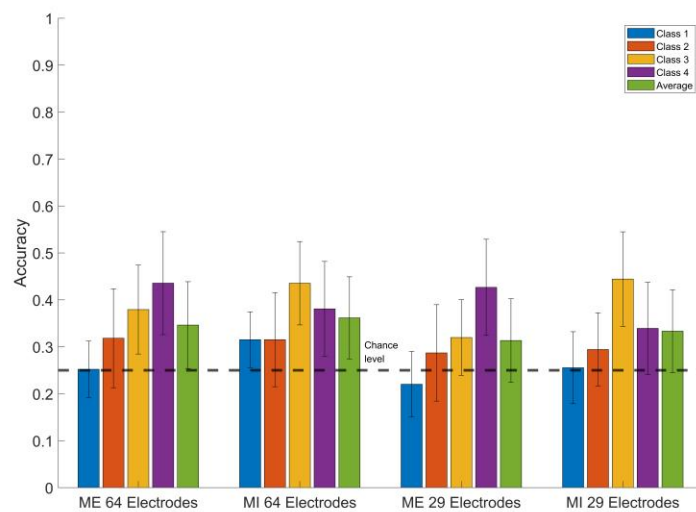

Supplementary Figure S21: The classification accuracy per class for MDMRU classifier under the different scenarios.

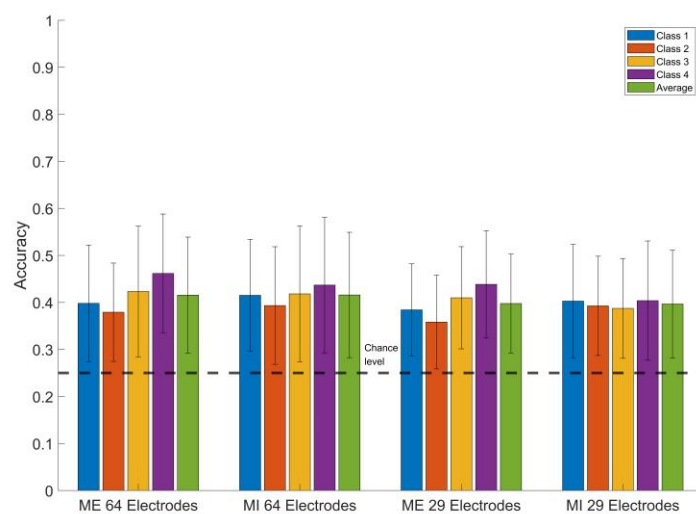

Supplementary Figure S22: The classification accuracy per class for FgMDM classifier under the different scenarios.

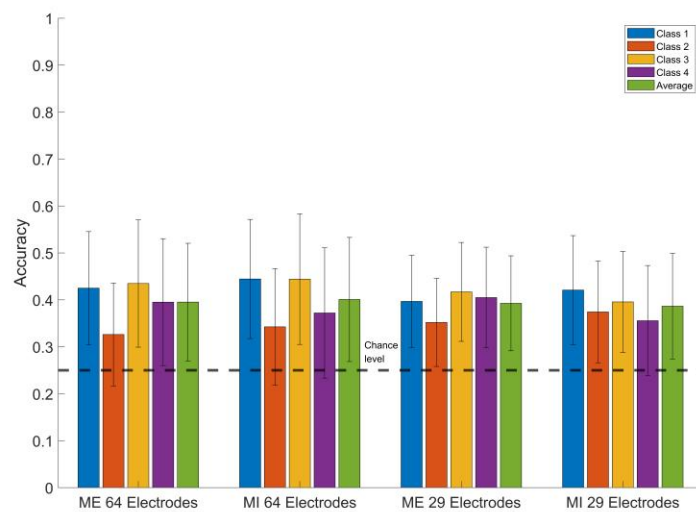

Supplementary Figure S23: The classification accuracy per class for FgMDMS classifier under the different scenarios.

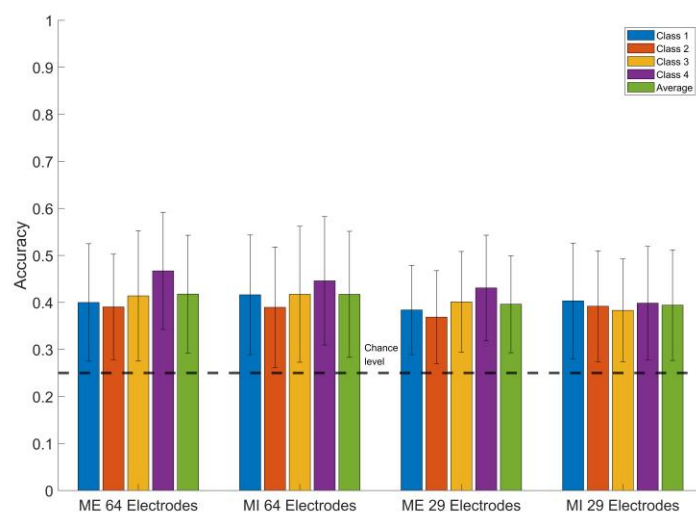

Supplementary Figure S24: The classification accuracy per class for FgMDMU classifier under the different scenarios.

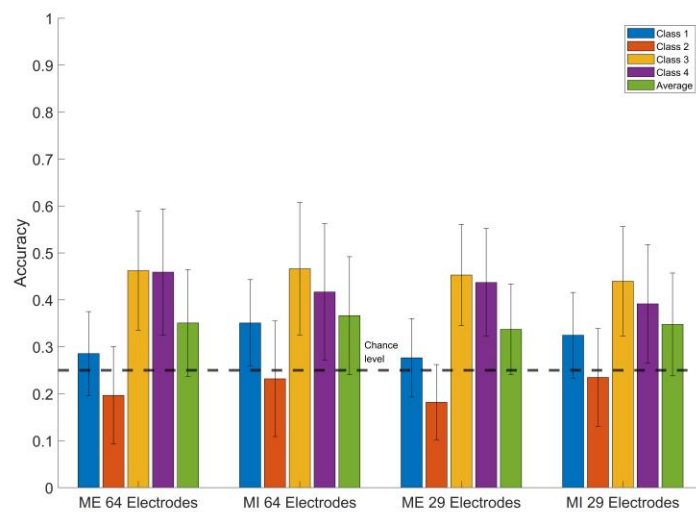

Supplementary Figure S25: The classification accuracy per class for FgMDMR classifier under the different scenarios.

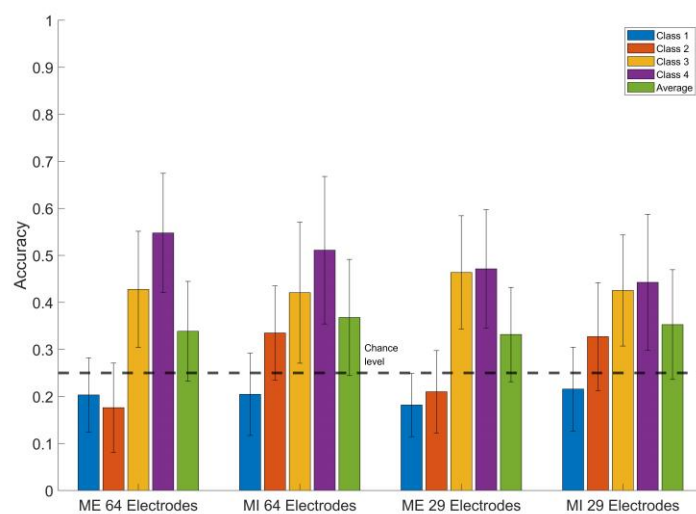

Supplementary Figure S26: The classification accuracy per class for FgMDMRS classifier under the different scenarios.

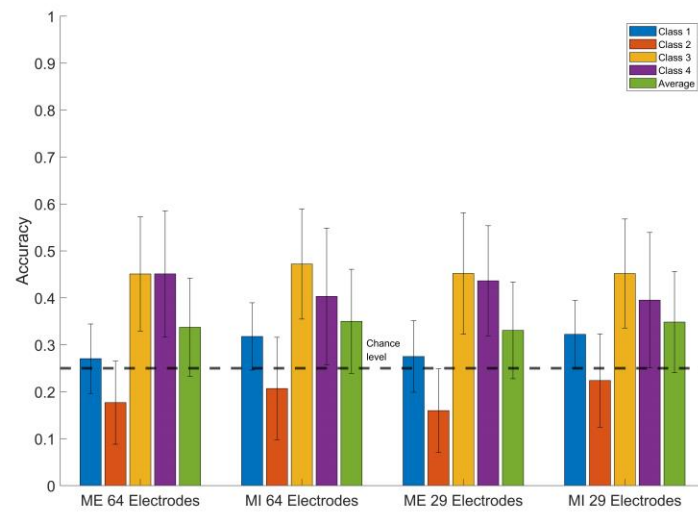

Supplementary Figure S27: The classification accuracy per class for FgMDMU classifier under the different scenarios.

# Confusion Matrices

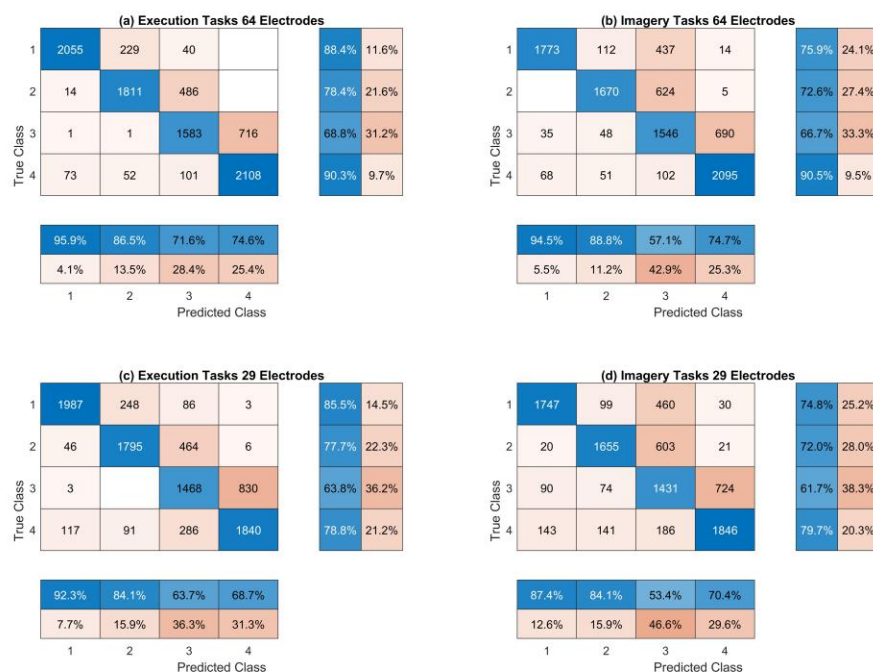

Supplementary Figure S28: MDM Classifier Confusion matrices

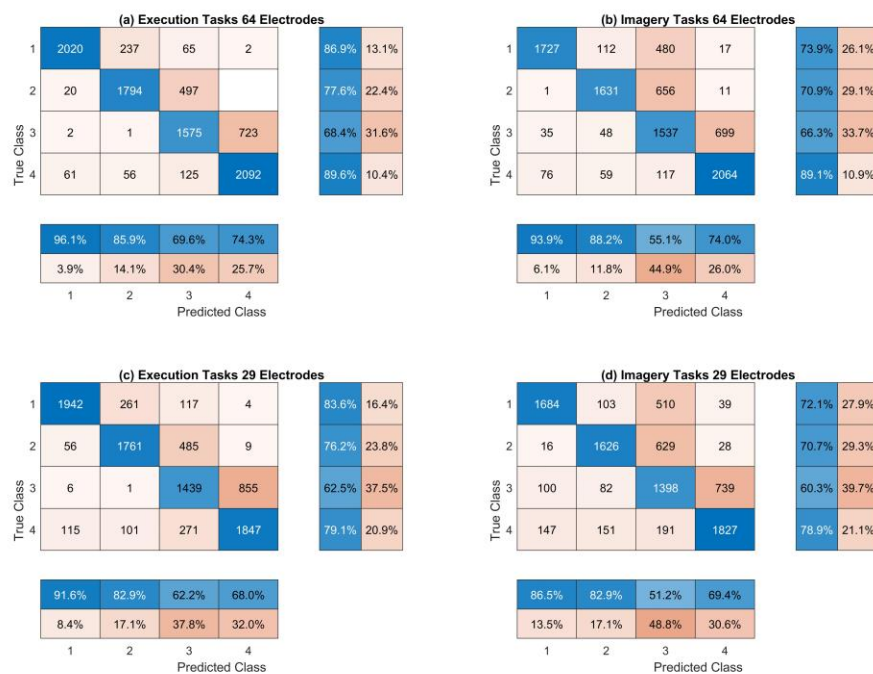

Supplementary Figure S29: MDMS Classifier Confusion matrices

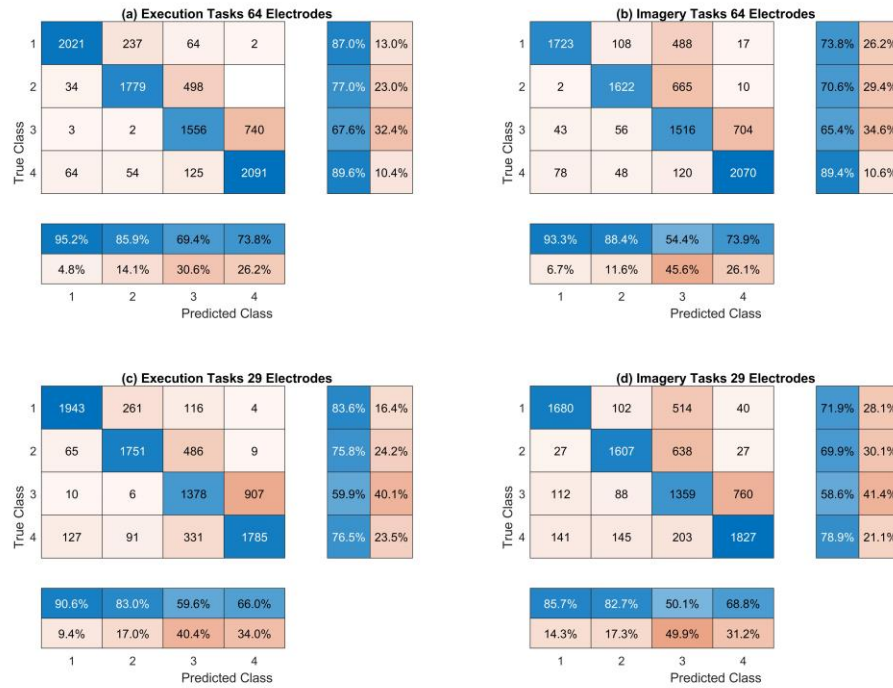

Supplementary Figure S30: MDMU Classifier Confusion matrices

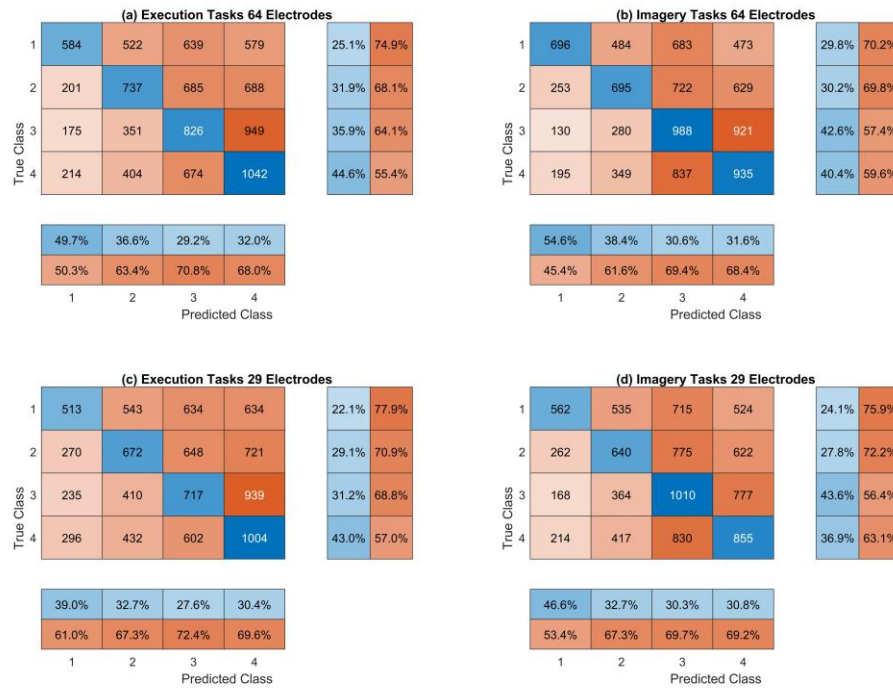

Supplementary Figure S31: MDMR Classifier Confusion matrices

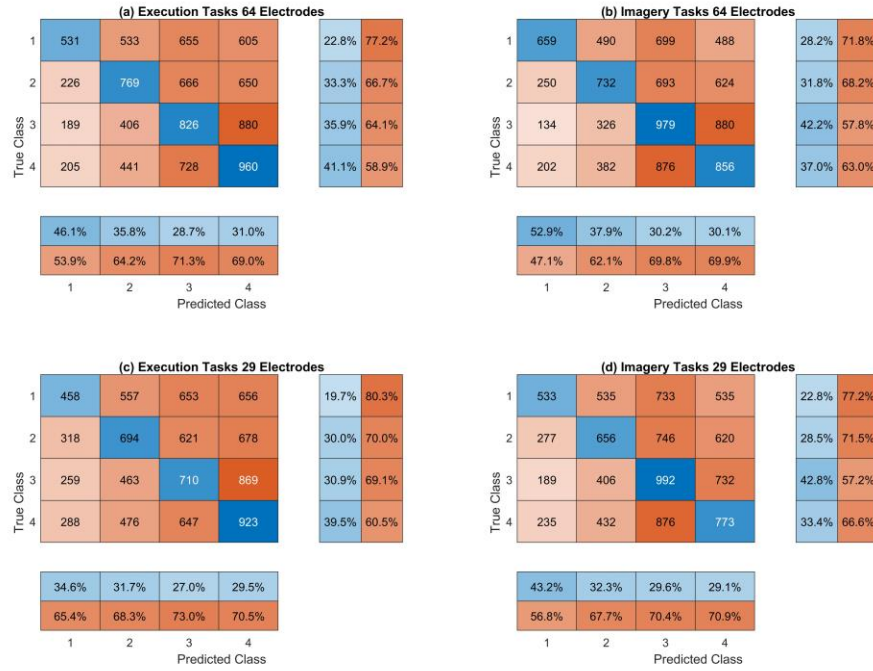

Supplementary Figure S32: MDMRS Classifier Confusion matrices

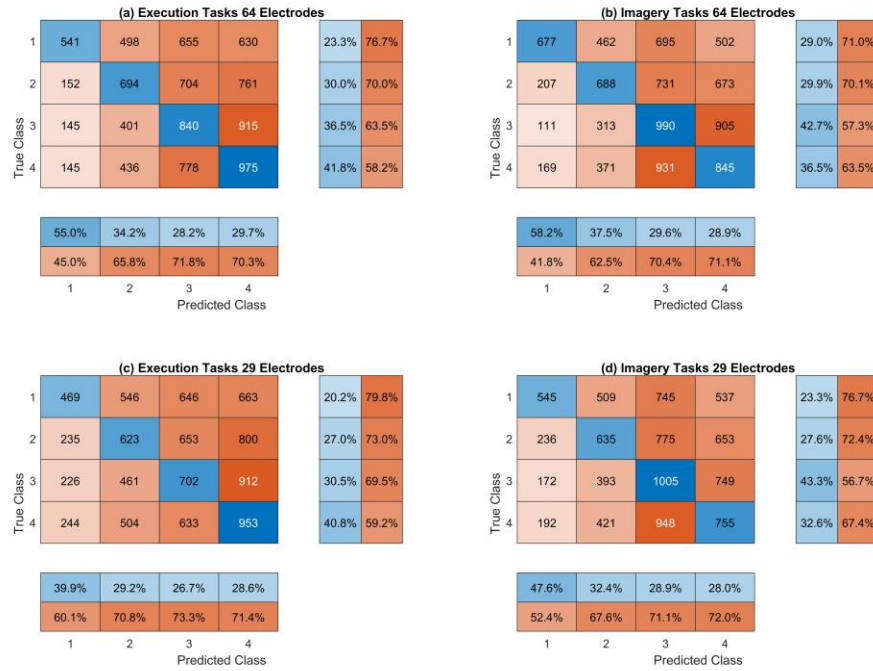

Supplementary Figure S33: MDMRU Classifier Confusion matrices

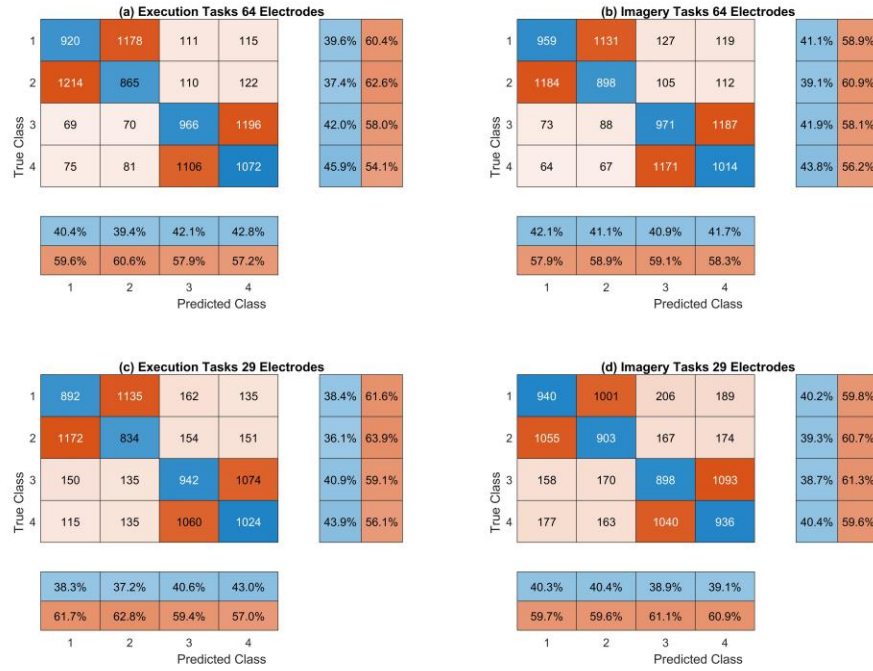

Supplementary Figure S34: FgMDM Classifier Confusion matrices

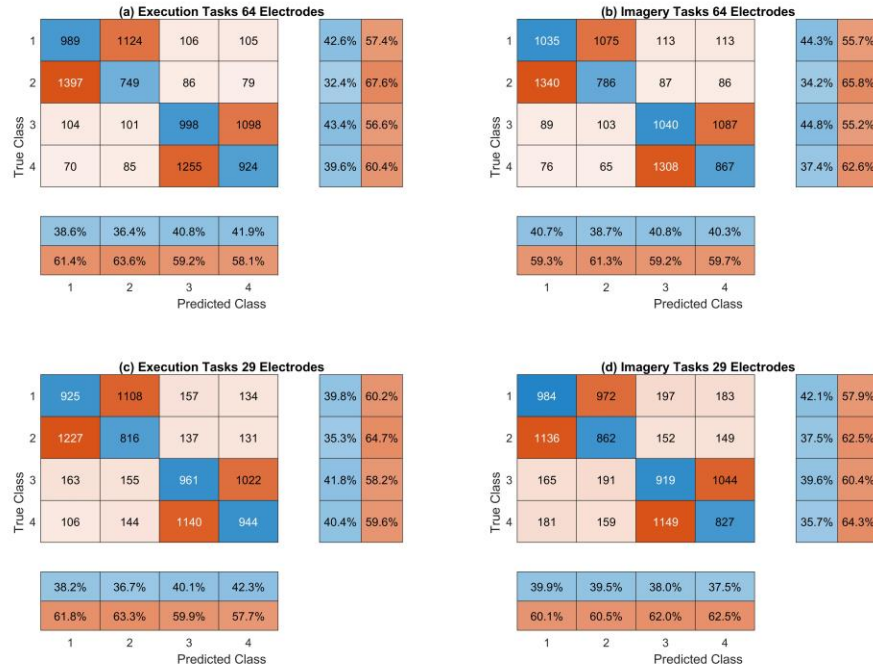

Supplementary Figure S35: FgMDMS Classifier Confusion matrices

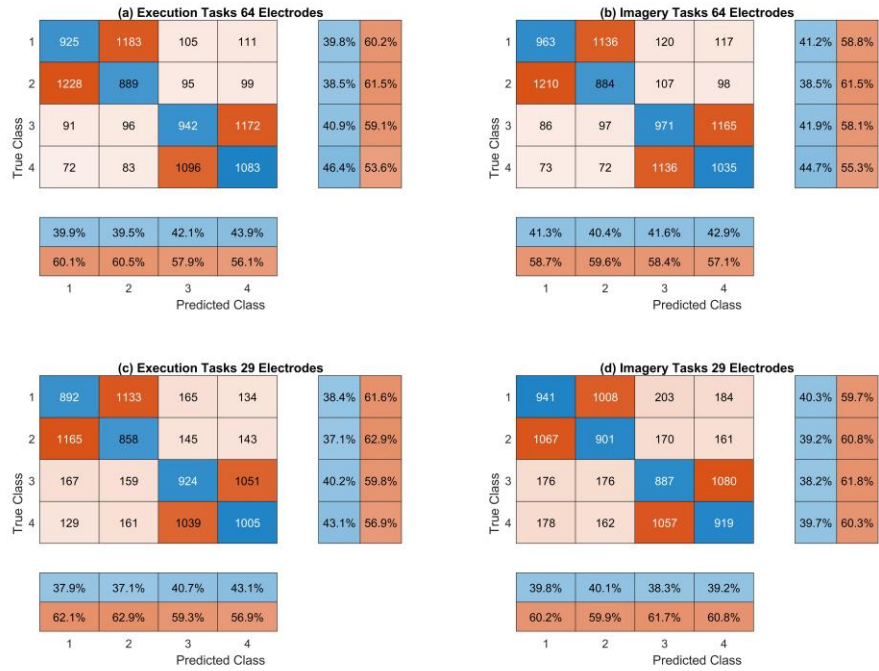

Supplementary Figure S36: FgMDMU Classifier Confusion matrices

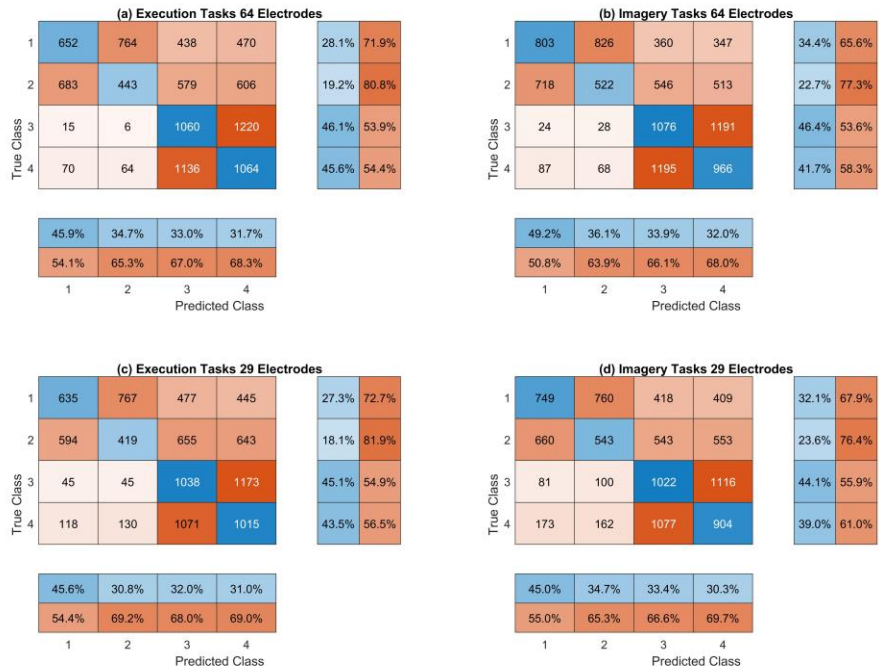

Supplementary Figure S37: FgMDMR Classifier Confusion matrices

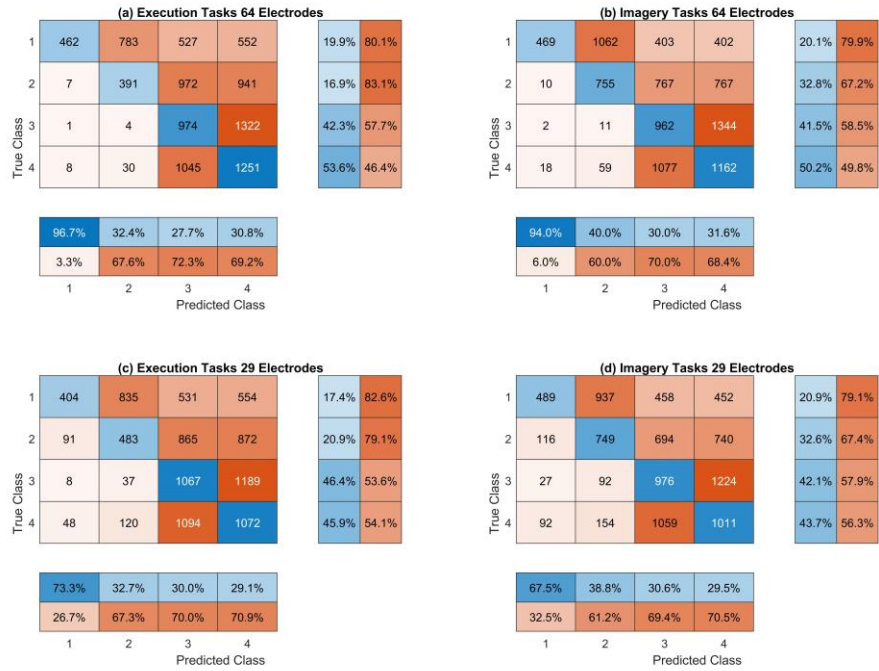

Supplementary Figure S38: FgMDMRS Classifier Confusion matrices

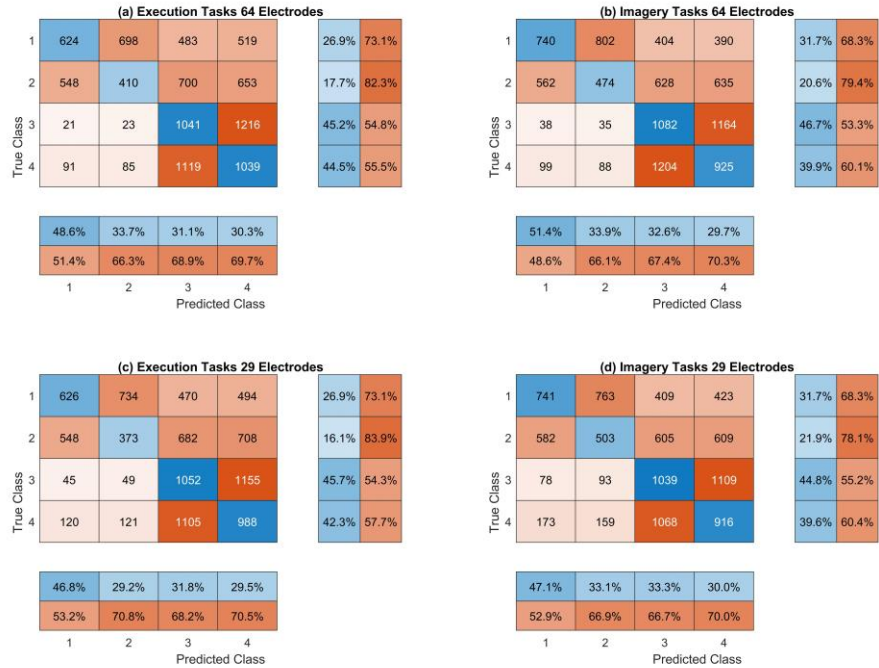

Supplementary Figure S39: FgMDMRU Classifier Confusion matrices

## Simple Main Effect and Pairwise Comparison Data Sheets

The following tables summarize the post hoc test (simple main effect). Emphasized values (***bold and italic***) are significant. Red values are negative, i.e. the performance of the classifier in the second column is lower than the performance of the classifier in the top row (tables 1-4) or lower than the performance in the fifth column (tables 5-8). White values mean no difference, i.e. 0.000 difference. All values are with a 95% confidence interval and the significance level is  $p < .01$ . Please note that the classification accuracies are represented as a percent.

Supplementary Table S4: Pairwise comparison of the classifiers when classifying ME Tasks using 29 electrodes.

|            |          | Classifier | MDMS                         | MDMU                          | MDMR                             | MDMRS                            | MDMRU                            | FgMDM                              | FgMDMS                            | FgMDMU                             | FgMDMR                           | FgMDMRS                          | FgMDMRU                          |
|------------|----------|------------|------------------------------|-------------------------------|----------------------------------|----------------------------------|----------------------------------|------------------------------------|-----------------------------------|------------------------------------|----------------------------------|----------------------------------|----------------------------------|
|            | Accuracy | Mean       | 75.39383                     | 73.96983                      | 31.34845                         | 30.04318                         | 29.63325                         | 39.82737                           | 39.33118                          | 39.68707                           | 33.51671                         | 30.04318                         | 32.78317                         |
| Classifier | Mean     | Std. Dev.  | 3.342126                     | 3.660805                      | 4.985203                         | 4.840529                         | 4.329559                         | 6.294564                           | 6.716091                          | 6.074696                           | 5.742214                         | 4.840529                         | 6.073656                         |
| MDM        | 76.48336 | 3.173769   | <b>1.090 (.536 to 1.643)</b> | <b>2.514 (1.797 to 3.230)</b> | <b>45.135 (43.193 to 47.076)</b> | <b>46.440 (44.568 to 48.313)</b> | <b>46.850 (45.076 to 48.625)</b> | <b>36.656 (34.493 to 38.819)</b>   | <b>37.152 (34.837 to 39.468)</b>  | <b>36.796 (34.659 to 38.933)</b>   | <b>42.967 (40.966 to 44.967)</b> | <b>43.840 (41.642 to 46.038)</b> | <b>43.700 (41.364 to 46.037)</b> |
| MDMS       | 75.39383 | 3.342126   |                              | <b>1.424 (.904 to 1.944)</b>  | <b>44.045 (42.088 to 46.003)</b> | <b>45.351 (43.499 to 47.202)</b> | <b>45.761 (43.963 to 47.559)</b> | <b>35.566 (33.372 to 37.760)</b>   | <b>36.063 (33.753 to 38.372)</b>  | <b>35.707 (33.559 to 37.855)</b>   | <b>41.877 (39.848 to 43.906)</b> | <b>42.751 (40.545 to 44.956)</b> | <b>42.611 (40.289 to 44.932)</b> |
| MDMU       | 73.96983 | 3.660805   |                              |                               | <b>42.621 (40.589 to 44.653)</b> | <b>43.927 (42.001 to 45.853)</b> | <b>44.337 (42.445 to 46.228)</b> | <b>34.142 (31.901 to 36.384)</b>   | <b>34.639 (32.264 to 37.013)</b>  | <b>34.283 (32.089 to 36.476)</b>   | <b>40.453 (38.381 to 42.525)</b> | <b>41.327 (39.025 to 43.629)</b> | <b>41.187 (38.822 to 43.552)</b> |
| MDMR       | 31.34845 | 4.985203   |                              |                               |                                  | <b>1.305 (.657 to 1.954)</b>     | <b>1.715 (.940 to 2.490)</b>     | <b>-8.479 (-11.001 to -5.957)</b>  | <b>-7.983 (-10.582 to -5.384)</b> | <b>-8.339 (-10.737 to -5.941)</b>  | <b>-2.168 (-4.511 to .175)</b>   | <b>-1.294 (-4.041 to 1.452)</b>  | <b>-1.435 (-4.145 to 1.276)</b>  |
| MDMRS      | 30.04318 | 4.840529   |                              |                               |                                  |                                  | <b>.410 (-.390 to 1.210)</b>     | <b>-9.784 (-12.323 to -7.245)</b>  | <b>-9.288 (-11.875 to -6.701)</b> | <b>-9.644 (-12.086 to -7.202)</b>  | <b>-3.474 (-5.836 to -1.111)</b> | <b>-2.600 (-5.361 to .162)</b>   | <b>-2.740 (-5.437 to -.043)</b>  |
| MDMRU      | 29.63325 | 4.329559   |                              |                               |                                  |                                  |                                  | <b>-10.194 (-12.674 to -7.714)</b> | <b>-9.698 (-12.252 to -7.144)</b> | <b>-10.054 (-12.372 to -7.736)</b> | <b>-3.883 (-6.171 to -1.596)</b> | <b>-3.010 (-5.631 to -.388)</b>  | <b>-3.150 (-5.775 to -.524)</b>  |
| FgMDM      | 39.82737 | 6.294564   |                              |                               |                                  |                                  |                                  |                                    | <b>.496 (-.439 to 1.432)</b>      | <b>.140 (-.666 to .947)</b>        | <b>6.311 (5.033 to 7.589)</b>    | <b>7.184 (5.542 to 8.827)</b>    | <b>7.044 (5.175 to 8.913)</b>    |
| FgMDMS     | 39.33118 | 6.716091   |                              |                               |                                  |                                  |                                  |                                    |                                   | <b>-.356 (-1.365 to .653)</b>      | <b>5.814 (4.467 to 7.161)</b>    | <b>6.688 (4.949 to 8.428)</b>    | <b>6.548 (4.55 to 8.546)</b>     |
| FgMDMU     | 39.68707 | 6.074696   |                              |                               |                                  |                                  |                                  |                                    |                                   |                                    | <b>6.170 (4.830 to 7.511)</b>    | <b>7.044 (5.366 to 8.722)</b>    | <b>6.904 (4.915 to 8.893)</b>    |
| FgMDMR     | 33.51671 | 5.742214   |                              |                               |                                  |                                  |                                  |                                    |                                   |                                    |                                  | <b>.874 (-.816 to 2.564)</b>     | <b>.734 (-1.114 to 2.581)</b>    |
| FgMDMRS    | 32.64293 | 5.558011   |                              |                               |                                  |                                  |                                  |                                    |                                   |                                    |                                  |                                  | <b>-.14 (-1.636 to 1.356)</b>    |

Supplementary Table S5: Pairwise comparison of the classifiers when classifying MI Tasks using 29 electrodes.

[illegible]

Supplementary Table S6: Pairwise comparison of the classifiers when classifying ME Tasks using 64 electrodes.

|            |          | Classifier | MDMS                    | MDMU                     | MDMR                            | MDMRS                           | MDMRU                           | FgMDM                              | FgMDMS                             | FgMDMU                             | FgMDMR                          | FgMDMRS                         | FgMDMRU                         |
|------------|----------|------------|-------------------------|--------------------------|---------------------------------|---------------------------------|---------------------------------|------------------------------------|------------------------------------|------------------------------------|---------------------------------|---------------------------------|---------------------------------|
|            | Accuracy | Mean       | 81.52093                | 80.70111                 | 80.33435                        | 34.4013                         | 33.29019                        | 32.90183                           | 41.24055                           | 39.48224                           | 41.4132                         | 33.20392                        | 33.59219                        |
| Classifier | Mean     | Std. Dev.  | 2.400122                | 2.872964                 | 3.43636                         | 4.615241                        | 4.339504                        | 4.320785                           | 7.458902                           | 7.814747                           | 6.968785                        | 5.715146                        | 6.443624                        |
| MDM        | 81.52093 | 2.400122   | .820 (.301<br>to 1.339) | 1.187 (.528<br>to 1.846) | 47.120<br>(45.311 to<br>48.928) | 48.231<br>(46.552 to<br>49.909) | 48.619<br>(46.888 to<br>50.350) | 40.280<br>(37.613 to<br>42.947)    | 42.039<br>(39.251 to<br>44.826)    | 40.108<br>(37.582 to<br>42.633)    | 46.796<br>(44.345 to<br>49.247) | 48.317<br>(45.955 to<br>50.679) | 47.929<br>(45.341 to<br>50.516) |
| MDMS       | 80.70111 | 2.872964   |                         | .367 (-.119<br>to .853)  | 46.300<br>(44.372 to<br>48.228) | 47.411<br>(45.643 to<br>49.179) | 47.799<br>(45.935 to<br>49.664) | 39.461<br>(36.726 to<br>42.195)    | 41.219<br>(38.360 to<br>44.078)    | 39.288<br>(36.685 to<br>41.890)    | 45.976<br>(43.488 to<br>48.465) | 47.497<br>(45.111 to<br>49.883) | 47.109<br>(44.471 to<br>49.747) |
| MDMU       | 80.33435 | 3.43636    |                         |                          | 45.933<br>(43.919 to<br>47.947) | 47.044<br>(45.157 to<br>48.931) | 47.433<br>(45.459 to<br>49.406) | 39.094<br>(36.267 to<br>41.921)    | 40.852<br>(37.909 to<br>43.796)    | 38.921<br>(36.233 to<br>41.609)    | 45.609<br>(43.030 to<br>48.189) | 47.130<br>(44.563 to<br>49.698) | 46.742<br>(44.019 to<br>49.465) |
| MDMR       | 34.4013  | 4.615241   |                         |                          |                                 | 1.111 (.450<br>to 1.772)        | 1.499<br>(-.584 to<br>2.415)    | -6.839 (-<br>9.674 to -<br>4.004)  | -5.081 (-<br>8.089 to -<br>2.072)  | -7.012 (-<br>9.671 to -<br>4.353)  | -3.324 (-<br>2.885 to<br>2.238) | 1.197 (-<br>1.572 to<br>3.967)  | .809 (-<br>2.077 to<br>3.695)   |
| MDMRS      | 33.29019 | 4.339504   |                         |                          |                                 |                                 | .388 (-.422<br>to 1.199)        | -7.950 (-<br>10.752 to -<br>5.149) | -6.192 (-<br>9.180 to -<br>3.204)  | -8.123 (-<br>10.755 to -<br>5.491) | -1.435 (-<br>3.977 to<br>1.108) | .086 (-<br>2.611 to<br>2.783)   | -3.302 (-<br>3.195 to<br>2.591) |
| MDMRU      | 32.90183 | 4.320785   |                         |                          |                                 |                                 |                                 | -8.339 (-<br>11.168 to -<br>5.509) | -6.580 (-<br>9.554 to -<br>3.607 ) | -8.511 (-<br>11.192 to -<br>5.831) | -1.823 (-<br>4.353 to<br>.707)  | -3.302 (-<br>3.038 to<br>2.434) | -.69 (-<br>3.536 to<br>2.155)   |
| FgMDM      | 41.24055 | 7.458902   |                         |                          |                                 |                                 |                                 |                                    | 1.758 (.729<br>to 2.787)           | .173 (-<br>1.082 to<br>.737)       | 6.516<br>(5.131 to<br>7.900)    | 8.037<br>(5.891 to<br>10.182)   | 7.648<br>(5.362 to<br>9.934)    |
| FgMDMS     | 39.48224 | 7.814747   |                         |                          |                                 |                                 |                                 |                                    |                                    | -1.931 (-<br>3.040 to -<br>.822)   | 4.757<br>(3.408 to<br>6.107)    | 6.278<br>(4.149 to<br>8.408)    | 5.890<br>(3.678 to<br>8.102)    |
| FgMDMU     | 41.4132  | 6.968785   |                         |                          |                                 |                                 |                                 |                                    |                                    |                                    | 6.688<br>(5.284 to<br>8.093)    | 8.209<br>(6.061 to<br>10.357)   | 7.821<br>(5.507 to<br>10.135)   |
| FgMDMR     | 34.72492 | 6.702413   |                         |                          |                                 |                                 |                                 |                                    |                                    |                                    |                                 | 1.521 (-<br>.407 to<br>3.449)   | 1.133 (-<br>.833 to<br>3.098)   |
| FgMDMRS    | 33.20392 | 5.715146   |                         |                          |                                 |                                 |                                 |                                    |                                    |                                    |                                 |                                 | -3.388 (-<br>1.916 to<br>1.139) |

Supplementary Table S7: Pairwise comparison of the classifiers when classifying MI Tasks using 64 electrodes.

[illegible]

Supplementary Table S8: Pairwise comparison of different classifier adaptation strategies: ME vs. MI when using 29 electrodes.

| Classifier | ME 29 Elect. |       | Pairwise Comparison              | MI 29 Elect. |       |
|------------|--------------|-------|----------------------------------|--------------|-------|
|            | Mean         | Std.  |                                  | Mean         | Std.  |
| MDM        | 76.483       | 3.174 | <b>4.434 (3.603 to 5.265)</b>    | 72.050       | 2.825 |
| MDMS       | 75.394       | 3.342 | <b>4.898 (4.128 to 5.667)</b>    | 70.496       | 2.693 |
| MDMU       | 73.970       | 3.661 | <b>4.142 (3.287 to 4.998)</b>    | 69.827       | 2.804 |
| MDMR       | 31.348       | 4.985 | <b>-1.737 (-2.927 to -0.547)</b> | 33.085       | 3.849 |
| MDMRS      | 30.043       | 4.841 | <b>-1.823 (-2.924 to -0.722)</b> | 31.866       | 3.409 |
| MDMRU      | 29.633       | 4.330 | <b>-2.082 (-3.071 to -1.093)</b> | 31.715       | 3.547 |
| FgMDM      | 39.827       | 6.295 | 0.162 (-1.586 to 1.910)          | 39.666       | 6.615 |
| FgMDMS     | 39.331       | 6.716 | 0.583 (-1.128 to 2.293)          | 38.749       | 6.767 |
| FgMDMU     | 39.687       | 6.075 | 0.334 (-1.336 to 2.005)          | 39.353       | 6.523 |
| FgMDMR     | 33.517       | 5.742 | <b>-1.197 (-2.673 to 0.278)</b>  | 34.714       | 5.630 |
| FgMDMRS    | 32.643       | 5.558 | <b>-2.147 (-3.897 to -0.397)</b> | 34.790       | 5.584 |
| FgMDMRU    | 32.783       | 6.074 | <b>-1.726 (-3.638 to 0.186)</b>  | 34.509       | 5.048 |

Supplementary Table S10: Pairwise comparison of different classifier adaptation strategies: 29 electrodes vs. 64 electrodes for ME trials.

| Classifier | ME 29 Elect. |       | Pairwise Comparison              | ME 64 Elect. |       |
|------------|--------------|-------|----------------------------------|--------------|-------|
|            | Mean         | Std.  |                                  | Mean         | Std.  |
| MDM        | 76.483       | 3.174 | <b>-5.038 (-5.717 to -4.358)</b> | 81.521       | 2.400 |
| MDMS       | 75.394       | 3.342 | <b>-5.307 (-6.048 to -4.567)</b> | 80.701       | 2.873 |
| MDMU       | 73.970       | 3.661 | <b>-6.365 (-7.269 to -5.460)</b> | 80.334       | 3.436 |
| MDMR       | 31.348       | 4.985 | <b>-3.053 (-4.224 to -1.882)</b> | 34.401       | 4.615 |
| MDMRS      | 30.043       | 4.841 | <b>-3.247 (-4.391 to -2.103)</b> | 33.290       | 4.340 |
| MDMRU      | 29.633       | 4.330 | <b>-3.269 (-4.324 to -2.214)</b> | 32.902       | 4.321 |
| FgMDM      | 39.827       | 6.295 | <b>-1.413 (-2.831 to 0.005)</b>  | 41.241       | 7.459 |
| FgMDMS     | 39.331       | 6.716 | 0.151 (-1.515 to 1.213)          | 39.482       | 7.815 |
| FgMDMU     | 39.687       | 6.075 | <b>-1.726 (-3.094 to -0.358)</b> | 41.413       | 6.969 |
| FgMDMR     | 33.517       | 5.742 | <b>-1.208 (-2.550 to .134)</b>   | 34.725       | 6.702 |
| FgMDMRS    | 32.643       | 5.558 | <b>-0.561 (-2.157 to 1.035)</b>  | 33.204       | 5.715 |
| FgMDMRU    | 32.783       | 6.074 | <b>-0.809 (-2.528 to 0.910)</b>  | 33.592       | 6.444 |

Supplementary Table S9: Pairwise comparison of different classifier adaptation strategies: ME vs. MI when using 64 electrodes.

| Classifier | ME 64 Elect. |       | Pairwise Comparison              | MI 64 Elect. |       |
|------------|--------------|-------|----------------------------------|--------------|-------|
|            | Mean         | Std.  |                                  | Mean         | Std.  |
| MDM        | 81.521       | 2.400 | <b>5.102 (4.501 to 5.704)</b>    | 76.419       | 3.355 |
| MDMS       | 80.701       | 2.873 | <b>5.631 (5.020 to 6.242)</b>    | 75.070       | 2.971 |
| MDMU       | 80.334       | 3.436 | <b>5.566 (4.946 to 6.187)</b>    | 74.768       | 3.229 |
| MDMR       | 34.401       | 4.615 | <b>-1.348 (-2.442 to -0.255)</b> | 35.750       | 3.532 |
| MDMRS      | 33.290       | 4.340 | <b>-1.510 (-2.576 to -0.445)</b> | 34.800       | 3.438 |
| MDMRU      | 32.902       | 4.321 | <b>-1.618 (-2.656 to -0.580)</b> | 34.520       | 3.058 |
| FgMDM      | 41.241       | 7.459 | <b>-0.205 (-1.838 to 1.429)</b>  | 41.446       | 7.614 |
| FgMDMS     | 39.482       | 7.815 | <b>-0.734 (-2.470 to 1.003)</b>  | 40.216       | 7.624 |
| FgMDMU     | 41.413       | 6.969 | <b>-0.151 (-1.644 to 1.342)</b>  | 41.564       | 7.025 |
| FgMDMR     | 34.725       | 6.702 | <b>-1.597 (-3.071 to -0.122)</b> | 36.321       | 6.413 |
| FgMDMRS    | 33.204       | 5.715 | <b>-2.913 (-5.131 to -0.694)</b> | 36.117       | 6.270 |
| FgMDMRU    | 33.592       | 6.444 | <b>-1.154 (-3.324 to 1.0152)</b> | 34.747       | 6.106 |

Supplementary Table S11: Pairwise comparison for different classifier adaptation strategies: 29 electrodes vs. 64 electrodes for MI trials.

| Classifier | MI 29 Elect. |       | Pairwise Comparison              | MI 64 Elect. |       |
|------------|--------------|-------|----------------------------------|--------------|-------|
|            | Mean         | Std.  |                                  | Mean         | Std.  |
| MDM        | 72.050       | 2.825 | <b>-4.369 (-5.139 to -3.600)</b> | 76.419       | 3.355 |
| MDMS       | 70.496       | 2.693 | <b>-4.574 (-5.346 to -3.802)</b> | 75.070       | 2.971 |
| MDMU       | 69.827       | 2.804 | <b>-4.941 (-5.760 to -4.121)</b> | 74.768       | 3.229 |
| MDMR       | 33.085       | 3.849 | <b>-2.665 (-3.709 to -1.620)</b> | 35.750       | 3.532 |
| MDMRS      | 31.866       | 3.409 | <b>-2.934 (-3.871 to -1.997)</b> | 34.800       | 3.438 |
| MDMRU      | 31.715       | 3.547 | <b>-2.805 (-3.730 to -1.879)</b> | 34.520       | 3.058 |
| FgMDM      | 39.666       | 6.615 | <b>-1.780 (-3.281 to -0.279)</b> | 41.446       | 7.614 |
| FgMDMS     | 38.749       | 6.767 | <b>-1.467 (-3.007 to .073)</b>   | 40.216       | 7.624 |
| FgMDMU     | 39.353       | 6.523 | <b>-2.211 (-3.625 to -.798)</b>  | 41.564       | 7.025 |
| FgMDMR     | 34.714       | 5.630 | <b>-1.607 (-2.879 to -0.336)</b> | 36.321       | 6.413 |
| FgMDMRS    | 34.790       | 5.584 | <b>-1.327 (-3.114 to 0.461)</b>  | 36.117       | 6.270 |
| FgMDMRU    | 34.509       | 5.048 | <b>-0.237 (-1.967 to 1.492)</b>  | 34.747       | 6.106 |
